# Supplementary material for: Investigating the anti-inflammatory potential of N -amidic acid organoselenium candidates: biological assessments, molecular docking, and molecular dynamics simulations
Source: Royal Society of Chemistry journal article supplement (doi:10.1039/d4ra04762a), 2024-01-01
Supplement: d4ra04762a1.pdf [file d4ra04762a1.pdf]

## Supporting Information

### Investigating the Anti-inflammatory Potential of *N*-Amidic Acids Organoselenium Candidates: Biological Assessments, Molecular Docking, and Molecular Dynamic Simulations

Hanan A. Althikrallah<sup>1,\*#</sup>, Saad Shaaban<sup>1,2,\*#</sup>, Ayman Abo Elmaaty<sup>3</sup>, Hussein Ba-Ghazal<sup>1</sup>, Mohammed N. Almarri<sup>1</sup>, Marwa Sharaky<sup>4</sup>, Radwan Alnajjar<sup>5</sup>, Ahmed A. Al-Karmalawy<sup>6,7,\*</sup>

<sup>1</sup> Department of Chemistry, College of Science, King Faisal University, Al-Ahsa 31982, Saudi Arabia.

<sup>2</sup> Department of Chemistry, Faculty of Science, Mansoura University, 35516 Mansoura, Egypt.

<sup>3</sup> Medicinal Chemistry Department, Faculty of Pharmacy, Port Said University, Port Said, 42511, Egypt.

<sup>4</sup> Cancer Biology Department, Pharmacology Unit, National Cancer Institute (NCI), Cairo University, Cairo, Egypt.

<sup>5</sup> CADD Unit, Faculty of Pharmacy, Libyan International Medical University, Benghazi, Libya.

<sup>6</sup> Department of Pharmaceutical Chemistry, College of Pharmacy, The University of Mashreq, Baghdad 10023, Iraq.

<sup>7</sup> Pharmaceutical Chemistry Department, Faculty of Pharmacy, Horus University–Egypt, New Damietta, 34518, Egypt.

#### \* Corresponding authors:

(H. A. Althikrallah) [halhekrallh@kfu.edu.sa](mailto:halhekrallh@kfu.edu.sa); (S. Shaaban) [sibrahim@kfu.edu.sa](mailto:sibrahim@kfu.edu.sa); (A. A. Al-Karmalawy) [akarmalawy@horus.edu.eg](mailto:akarmalawy@horus.edu.eg)

# These two authors contributed equally.

## SI1. Chemistry

### 1.1. Material and methods

Melting points were recorded in degree centigrade on a Gallenkamp instrument using the standard open capillary method. The IR spectra were recorded on FTIR 5000 Mattson spectrophotometer. The  $^1\text{H}$ - and  $^{13}\text{C}$ -NMR spectra were recorded in  $\text{DMSO}-d_6$  on a Varian 400 and 500 Spectrophotometer ( $^1\text{H}$ : 400 and 500 MHz,  $^{13}\text{C}$ : 101 and 125 MHz) at 295 K. The chemical shifts ( $\delta$ ) are given in parts per million (ppm) downfield relative to tetramethyl silane (TMS). Mass Spectra were recorded on Bruker micrOTOFQ II APPI mass spectrometer. Compounds **2–6** were obtained according to our literature reports <sup>1-2</sup>, and the new compounds **7–12** obtained according to our literature reports <sup>3</sup>.

### 1.2. Synthesis and characterization

#### The synthesis of OSe maleanilic **7**, **9**, and **11** and succinilic **8**, **10**, and **12** derivatives

Maleic or succinic anhydride (1.3 mmol) was added to OSe amine (1.0 mmol) in methylbenzene (3.0 mL). The solution was stirred for 8 hrs. Then, the formed precipitate was filtered and washed with warm methylbenzene and water. The acids were obtained in enough purity, and no further purifications were needed.

#### *Synthesis of methyl 2-amino-5-selenocyanatobenzoate (2)* <sup>1, 4</sup>

Methyl 2-amino-5-selenocyanatobenzoate (**2**) was synthesized from methyl 2-aminobenzoate (12.5 mmol, 1.80 g) with triselenium dicyanide prepared *in situ* from malononitrile (15 mmol, 1.00 g) and selenium dioxide (30 mmol, 3.30 g). It was isolated as reddish solid; yield: 3.07 g (96%); m.p. = 118–119 °C; R<sub>f</sub> = 0.4 (petroleum ether / ethyl acetate 4:2, v/v). IR (KBr):  $\nu$  3475 (N-H), 3366 (N-H), 2946 (C<sub>aliph</sub>-H), 2842 (C<sub>aliph</sub>-H), 2148 (CN), 1691 (C=O), 1551 (C=C), 1253 (C<sub>Ar</sub>-N), 1085 (C-O), 910, 815 (C-H bending), 556 (C-Se), 536 (C-H rocking), 460;  $^1\text{H}$  NMR (400 MHz,  $\text{DMSO}-d_6$ )  $\delta$  8.02 (s, 1H, Ar-H), 7.57 (d,  $J$  = 8.8 Hz, 1H, Ar-H), 7.08 (s, br, 2H, NH<sub>2</sub>), 6.84 (d,  $J$  = 8.8 Hz, 1H, Ar-H), 3.82 (s, 3H, OCH<sub>3</sub>).  $^{13}\text{C}$  NMR (101 MHz,  $\text{DMSO}-d_6$ )  $\delta$  166.73, 152.22, 140.09, 137.94, 118.28, 109.59, 105.54, 105.47, 51.73. MS (EI, 70 eV)  $m/z$  (%) = 259.35 (M+3H, 2.39), 117 (29.02), 87 (26.6), 75 (2.70), 59 (100.0, base peak).

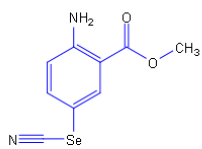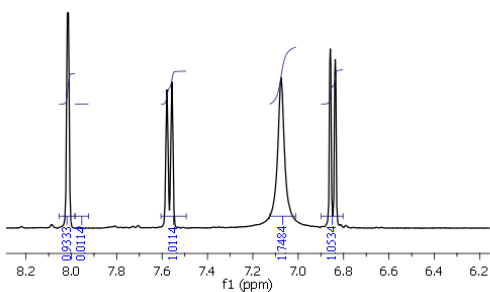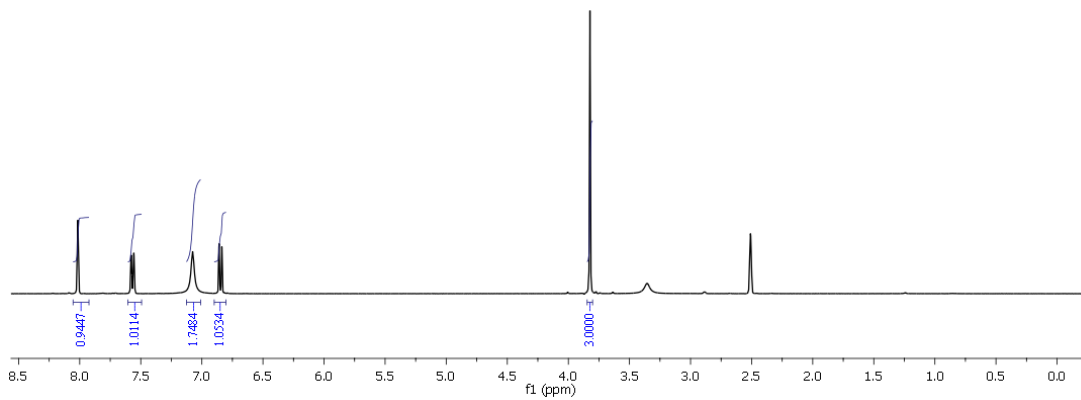

<sup>1</sup>H NMR chart of compound 2

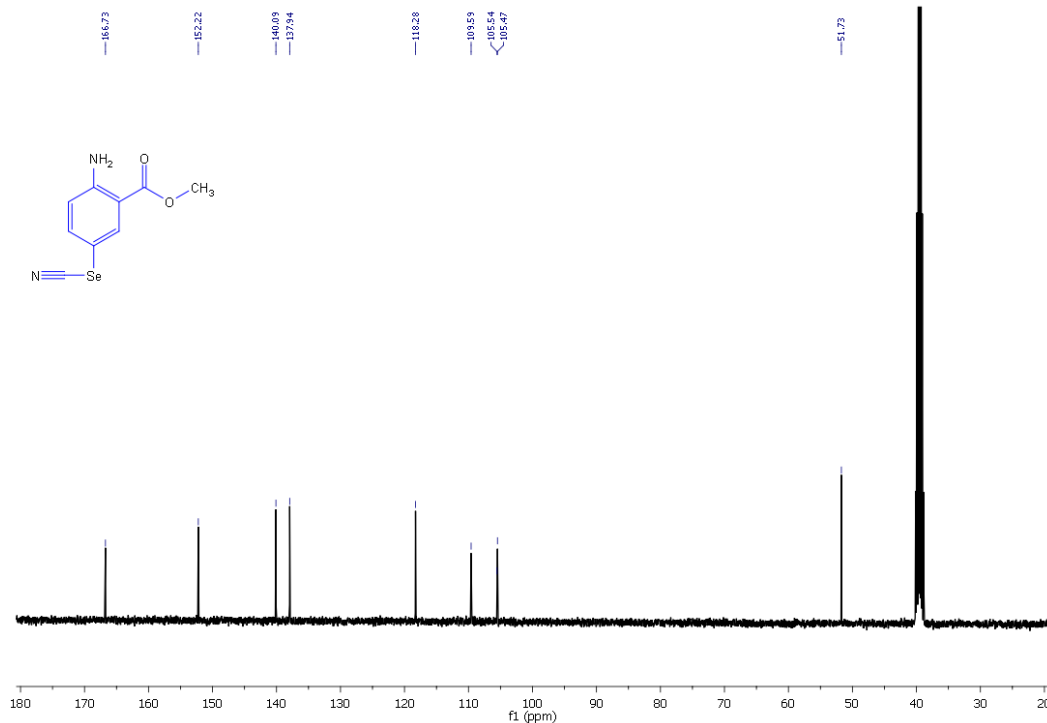

<sup>13</sup>C NMR chart of compound 2

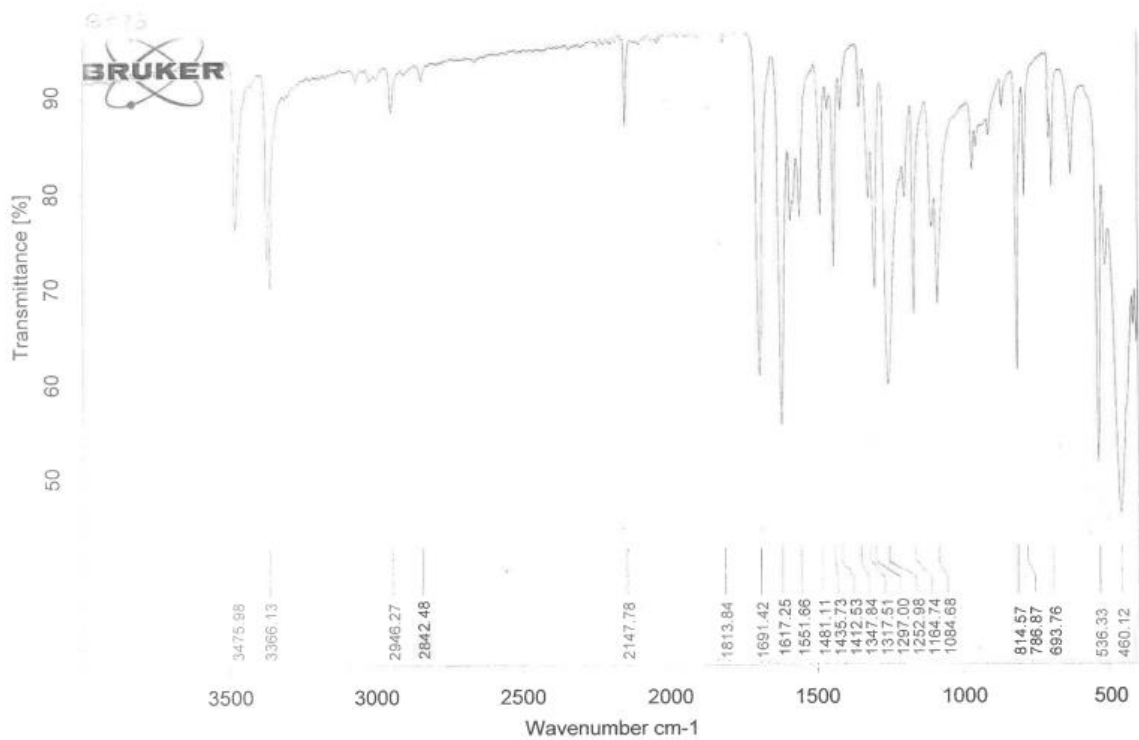

IR chart of compound 2

**Cairo University  
Micro Analytical Center**

**DI Analysis  
Shimadzu Qp-2010 Plus**

Sample Information  
 Analyzed by : Dr. Mai Younis  
 Analyzed : 06/01/2007 07:26:19  
 Sample Name : B2  
 Sample ID :  
 Customer Name : Dr. Mohamed Soliman - Science - Cairo  
 Data File : C:\GCMSolution\Data\Project1\B2.QGD  
 Org Data File : C:\GCMSolution\Data\Project1\B2.QGD  
 Method File : C:\GCMSolution\Data\Project1\High Temperature Op  
 Org Method File : C:\GCMSolution\Data\Project1\High Temperature Op  
 Report File :  
 Timing File : C:\GCMSolution\System\Tune1\_default.qpt  
 \$File\$Modified by : Dr. Mai Younis  
 Modified : 06/01/2007 07:32:04

Method  
 Analytical Line 1  
 IonSourceTemp : 230.00 °C  
 [MS Table]  
 --Group 1 - Event 1--  
 Start Time : 0.00min  
 End Time : 10.00min  
 ACQ Mode : Scan  
 Event Time : 0.50sec  
 Scan Speed : 1600  
 Start m/z : -50.00  
 End m/z : -10.00  
 Electron Voltage : 70 eV  
 Ionization Mode : EI

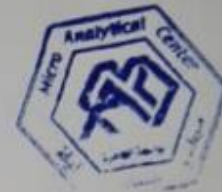

C:\GCMSolution\Data\Project1\B2.QGD

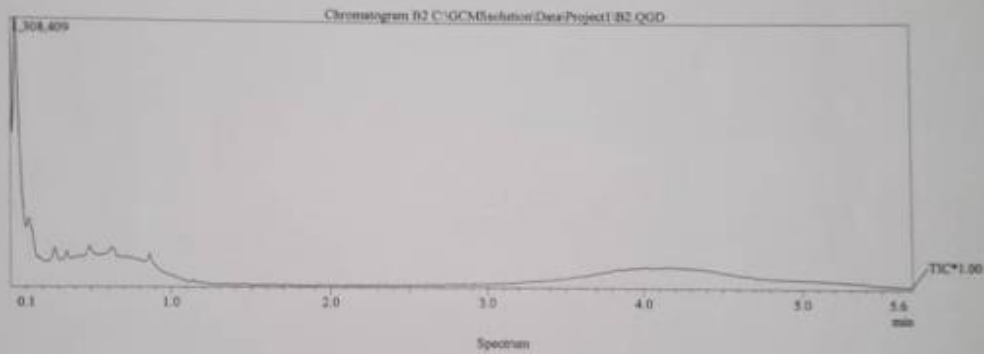

Line# 1 R.Time:4.1(Scan# 490)  
 MassPeaks:76  
 RawMode:Single 4.1(490) BasePeak:59(21586)  
 BG Mode:None Group 1 - Event 1

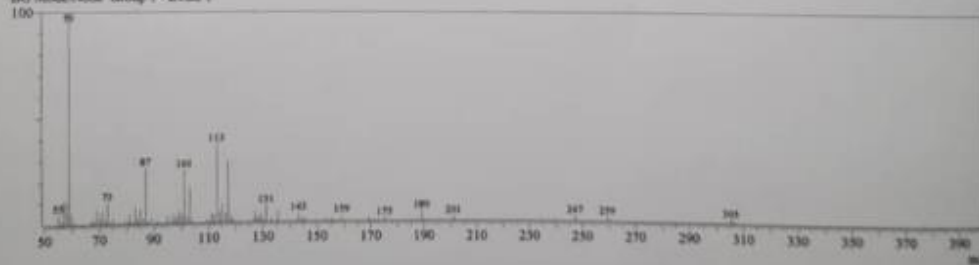

Mass Table  
 Line# 1 R.Time:4.1(Scan# 490)  
 MassPeaks:76  
 RawMode:Single 4.1(490) BasePeak:59(21586)  
 BG Mode:None Group 1 - Event 1

| # | m/z   | Abs. In | Rel. Int. | # | m/z   | Abs. In | Rel. Int. | # | m/z   | Abs. In | Rel. Int. |
|---|-------|---------|-----------|---|-------|---------|-----------|---|-------|---------|-----------|
| 1 | 55.05 | 1062    | 4.92      | 4 | 58.05 | 2312    | 10.71     | 7 | 61.00 | 236     | 1.09      |
| 2 | 56.05 | 354     | 1.64      | 5 | 59.00 | 21586   | 100.00    | 8 | 67.10 | 468     | 2.17      |
| 3 | 57.05 | 2418    | 11.20     | 6 | 59.95 | 1083    | 5.02      | 9 | 68.15 | 341     | 1.58      |

Mass chart of compound 2

| #  | m/z   | Abs. Int. | Rel. Int. | #  | m/z    | Abs. Int. | Rel. Int. | #  | m/z    | Abs. Int. | Rel. Int. |
|----|-------|-----------|-----------|----|--------|-----------|-----------|----|--------|-----------|-----------|
| 10 | 69.05 | 1515      | 7.02      | 33 | 97.10  | 945       | 4.38      | 56 | 130.15 | 304       | 1.41      |
| 11 | 70.10 | 633       | 2.93      | 34 | 98.15  | 599       | 2.77      | 57 | 131.10 | 1722      | 7.98      |
| 12 | 71.05 | 1365      | 6.32      | 35 | 99.10  | 1268      | 5.87      | 58 | 133.15 | 432       | 2.00      |
| 13 | 72.05 | 440       | 2.04      | 36 | 100.15 | 840       | 3.89      | 59 | 135.20 | 1132      | 5.24      |
| 14 | 73.00 | 2258      | 10.46     | 37 | 101.10 | 5503      | 25.49     | 60 | 143.10 | 908       | 4.21      |
| 15 | 74.00 | 302       | 1.40      | 38 | 102.15 | 699       | 3.24      | 61 | 144.10 | 210       | 0.97      |
| 16 | 75.05 | 583       | 2.70      | 39 | 103.10 | 3649      | 16.90     | 62 | 145.20 | 492       | 2.28      |
| 17 | 77.00 | 268       | 1.24      | 40 | 104.10 | 322       | 1.49      | 63 | 153.20 | 234       | 1.08      |
| 18 | 79.00 | 223       | 1.03      | 41 | 109.10 | 401       | 1.86      | 64 | 155.20 | 281       | 1.30      |
| 19 | 80.10 | 324       | 1.50      | 42 | 110.10 | 220       | 1.02      | 65 | 159.15 | 662       | 3.07      |
| 20 | 81.10 | 954       | 4.42      | 43 | 111.10 | 969       | 4.49      | 66 | 169.20 | 334       | 1.55      |
| 21 | 82.15 | 315       | 1.46      | 44 | 112.15 | 807       | 3.74      | 67 | 171.20 | 204       | 0.95      |
| 22 | 83.10 | 1628      | 7.54      | 45 | 113.10 | 8084      | 37.45     | 68 | 173.20 | 202       | 0.94      |
| 23 | 84.10 | 481       | 2.23      | 46 | 114.10 | 1199      | 5.55      | 69 | 175.20 | 346       | 1.60      |
| 24 | 85.05 | 1397      | 6.47      | 47 | 115.10 | 2001      | 9.27      | 70 | 189.20 | 1038      | 4.81      |
| 25 | 86.05 | 492       | 2.28      | 48 | 116.25 | 936       | 4.34      | 71 | 201.15 | 502       | 2.33      |
| 26 | 87.05 | 5752      | 26.65     | 49 | 117.15 | 6264      | 29.02     | 72 | 247.20 | 575       | 2.66      |
| 27 | 88.00 | 314       | 1.45      | 50 | 118.15 | 607       | 2.81      | 73 | 259.35 | 515       | 2.39      |
| 28 | 89.05 | 560       | 2.59      | 51 | 119.20 | 271       | 1.26      | 74 | 260.40 | 207       | 0.96      |
| 29 | 91.10 | 327       | 1.51      | 52 | 126.15 | 310       | 1.44      | 75 | 305.40 | 401       | 1.86      |
| 30 | 94.10 | 202       | 0.94      | 53 | 127.10 | 1102      | 5.11      | 76 | 306.40 | 281       | 1.30      |
| 31 | 95.10 | 807       | 3.74      | 54 | 128.15 | 589       | 2.73      |    |        |           |           |
| 32 | 96.10 | 278       | 1.29      | 55 | 129.10 | 740       | 3.43      |    |        |           |           |

Mass chart of compound 2

### Synthesis of dimethyl 5,5'-diselanediybis(2-aminobenzoate) (**3**)<sup>1,4</sup>

Compound dimethyl 5,5'-diselanediybis(2-aminobenzoate) (**3**) was synthesized from methyl 2-amino-5-selenocyanatobenzoate (4 mmol, 1.00 g) and sodium hydroxide (4 mmol, 1.60 g) in anhydrous ethanol (20 mL). Dimethyl 5,5'-diselanediybis(2-aminobenzoate) (**3**) appeared as a single compound on TLC and was isolated as a yellow solid; yield: 1.69 g (92%); m.p. = 138–139 °C; R<sub>f</sub> = 0.5 (petroleum ether / ethyl acetate 4:3, v/v). IR (KBr):  $\nu$  3455 (N-H), 3344 (N-H), 2931 (C<sub>aliph</sub>-H), 2890 (C<sub>aliph</sub>-H), 2168 (CN), 1684 (C=O), 1560 (C=C), 1603, 1238 (C<sub>Ar</sub>-N), 1079 (C-O), 811, 784 (C-H bending), 699 (C-H rocking), 533 (C-Se); <sup>1</sup>H NMR (400 MHz, DMSO-*d*<sub>6</sub>)  $\delta$  7.70 (s, 2H, Ar-H), 7.44 (d, J = 8.6 Hz, 2H, Ar-H), 7.00 (s, 4H, 2NH<sub>2</sub>), 6.77 (d, J = 8.6 Hz, 2H, Ar-H), 3.74 (s, 6H, 2OCH<sub>3</sub>). <sup>13</sup>C NMR (101 MHz, DMSO-*d*<sub>6</sub>)  $\delta$  167.00, 151.91, 140.57, 138.13, 117.63, 113.57, 108.98, 51.52. MS (EI, 70 ev) *m/z* (%) = 460.15 (M+H, 20.76), 459.15 (M, 5.20) or 230 (24.42), 119 (9.45), 91 (100.0, base peak), 65 (8.88).

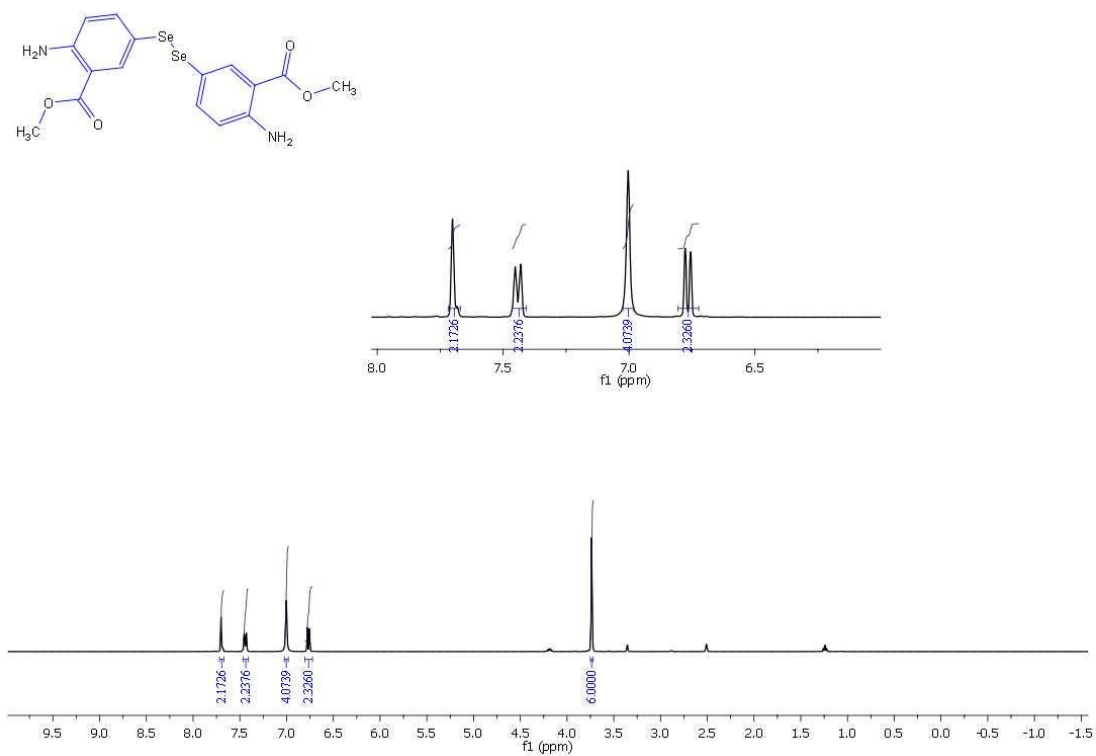

<sup>1</sup>H NMR chart of compound **3**

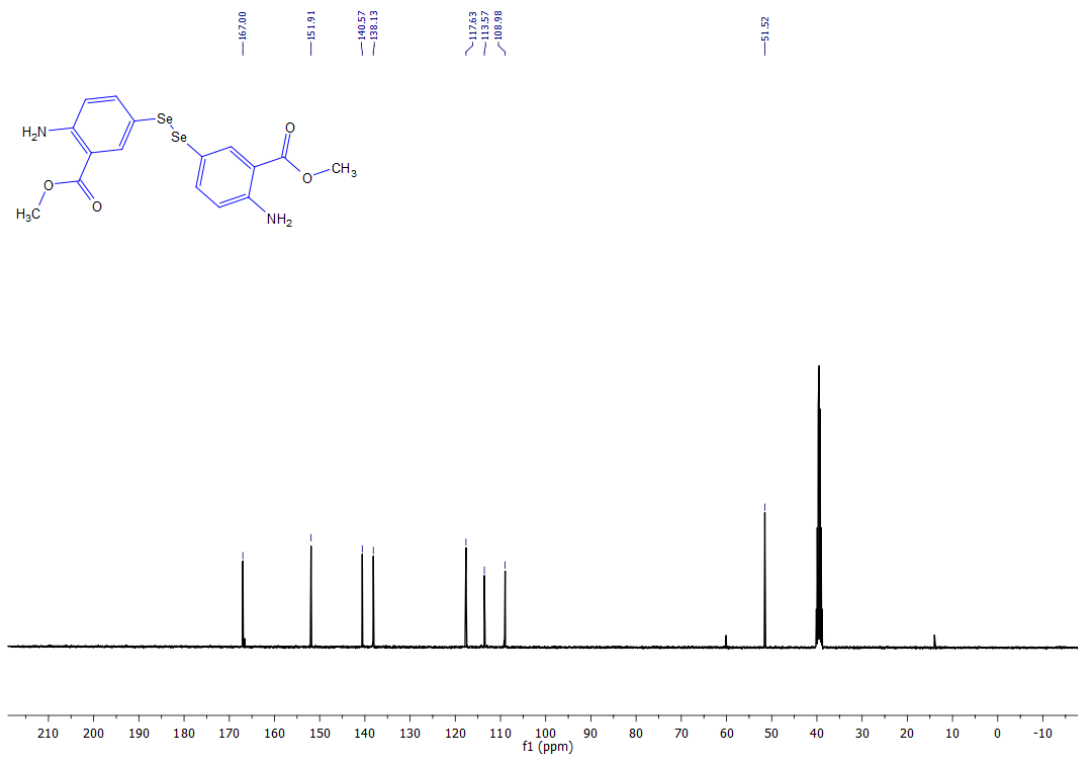

$^{13}\text{C}$  NMR chart of compound 3

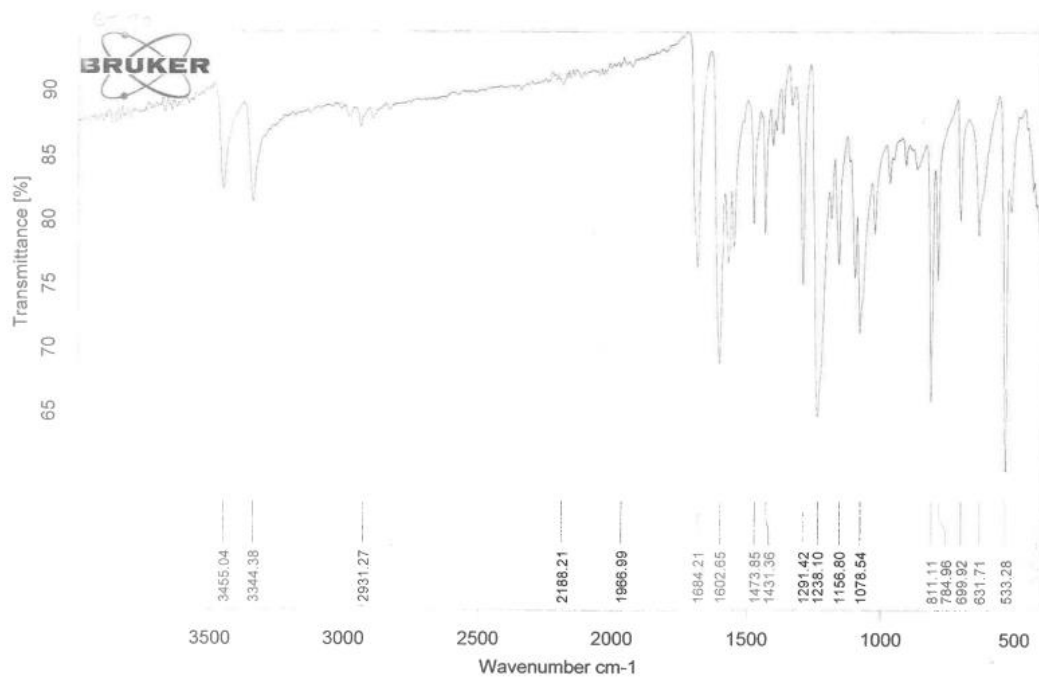

IR chart of compound 3



**Cairo University  
Micro Analytical Center**

**DI Analysis  
Shimadzu Qp-2010 Plus**

Sample Information  
 Analyzed by: Dr. Mai Younis  
 Analyzed: 06/01/2007 07:17:06  
 Sample Name: B1  
 Sample ID:  
 Customer Name: Dr. Mohamed Soliman - Science - Cairo  
 Data File: C:\GCMSolution\Data\Project1\B1.QGD  
 Org Data File: C:\GCMSolution\Data\Project1\B1.QGD  
 Method File: C:\GCMSolution\Data\Project1\High Temperature Op  
 Org Method File: C:\GCMSolution\Data\Project1\High Temperature Op  
 Report File:  
 Tuning File: C:\GCMSolution\System\Tune1\\_default.qst  
 SEndIfSModified by: Dr. Mai Younis  
 Modified: 06/01/2007 07:22:24

Method  
 Analytical Line 1  
 IonSourceTemp: 250.00 °C  
 [MS Table]  
 --Group 1 - Event 1--  
 Start Time: 0.00min  
 End Time: 10.00min  
 ACQ Mode: Scan  
 Event Time: 0.50sec  
 Scan Speed: 1000  
 Start m/z: 30.00  
 End m/z: 510.00  
 Electron Voltage: 70 eV  
 Ionization Mode: EI

*Dr. Mohamed Soliman*  
*GC/MS*  
*(C/U)*



C:\GCMSolution\Data\Project1\B1.QGD

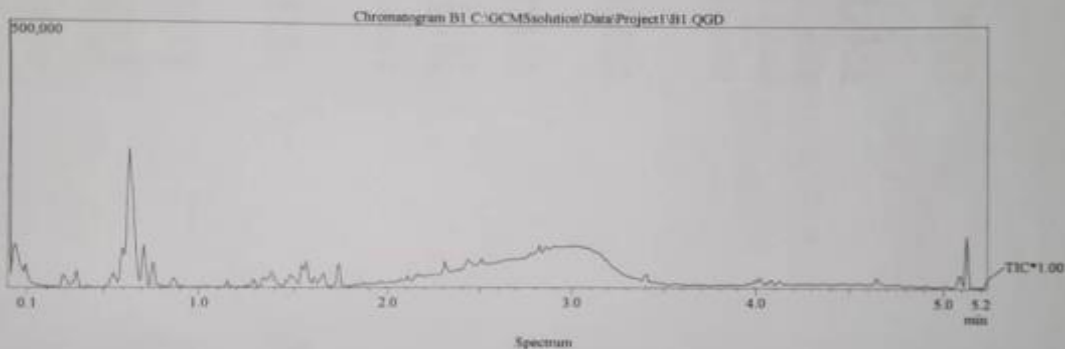

Line#:1 R.Time:2.9(Scan#:352)  
 MassPeaks:90  
 RawMode:Single 2.9(352) BasePeak:91(10811)  
 BG Mode:None Group 1 - Event 1

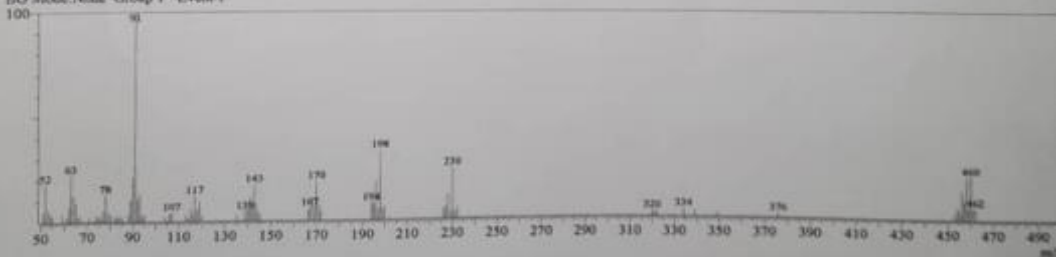

Mass Table  
 Line#:1 R.Time:2.9(Scan#:352)  
 MassPeaks:90  
 RawMode:Single 2.9(352) BasePeak:91(10811)  
 BG Mode:None Group 1 - Event 1

| # | m/z   | Abs. In | Rel. Int. | # | m/z   | Abs. In | Rel. Int. | # | m/z   | Abs. In | Rel. Int. |
|---|-------|---------|-----------|---|-------|---------|-----------|---|-------|---------|-----------|
| 1 | 51.05 | 519     | 4.80      | 4 | 54.05 | 471     | 4.36      | 7 | 61.00 | 255     | 2.36      |
| 2 | 51.95 | 1953    | 18.06     | 5 | 55.10 | 305     | 2.82      | 8 | 62.05 | 723     | 6.69      |
| 3 | 53.05 | 620     | 5.73      | 6 | 59.05 | 411     | 3.80      | 9 | 63.00 | 2398    | 22.18     |

Mass chart of compound 3

| #  | m/z    | Abs. In | Rel. Int. | #  | m/z    | Abs. In | Rel. Int. | #  | m/z    | Abs. In | Rel. Int. |
|----|--------|---------|-----------|----|--------|---------|-----------|----|--------|---------|-----------|
| 10 | 64.05  | 1311    | 12.13     | 37 | 113.00 | 308     | 2.85      | 64 | 198.00 | 3602    | 33.32     |
| 11 | 65.05  | 960     | 8.88      | 38 | 113.90 | 222     | 2.05      | 65 | 199.00 | 591     | 5.47      |
| 12 | 66.00  | 278     | 2.57      | 39 | 114.90 | 636     | 5.88      | 66 | 200.05 | 690     | 6.38      |
| 13 | 67.00  | 247     | 2.28      | 40 | 116.05 | 385     | 3.56      | 67 | 226.05 | 505     | 4.67      |
| 14 | 71.00  | 202     | 1.87      | 41 | 117.00 | 1319    | 12.20     | 68 | 227.05 | 655     | 6.06      |
| 15 | 74.00  | 313     | 2.90      | 42 | 118.05 | 599     | 5.54      | 69 | 228.00 | 1222    | 11.30     |
| 16 | 75.00  | 255     | 2.36      | 43 | 119.10 | 1022    | 9.45      | 70 | 229.15 | 316     | 2.92      |
| 17 | 76.00  | 214     | 1.98      | 44 | 120.10 | 310     | 2.87      | 71 | 230.05 | 2640    | 24.42     |
| 18 | 77.05  | 571     | 5.28      | 45 | 135.10 | 289     | 2.67      | 72 | 231.05 | 347     | 3.21      |
| 19 | 78.05  | 1366    | 12.64     | 46 | 139.00 | 482     | 4.46      | 73 | 232.05 | 594     | 5.49      |
| 20 | 79.10  | 466     | 4.31      | 47 | 140.00 | 614     | 5.68      | 74 | 320.00 | 290     | 2.68      |
| 21 | 80.10  | 388     | 3.59      | 48 | 141.05 | 1196    | 11.06     | 75 | 321.00 | 222     | 2.05      |
| 22 | 82.10  | 233     | 2.16      | 49 | 142.05 | 619     | 5.73      | 76 | 322.00 | 228     | 2.11      |
| 23 | 83.10  | 260     | 2.40      | 50 | 143.00 | 1894    | 17.52     | 77 | 334.00 | 398     | 3.68      |
| 24 | 84.10  | 220     | 2.03      | 51 | 144.00 | 850     | 7.86      | 78 | 339.00 | 318     | 2.94      |
| 25 | 85.10  | 278     | 2.57      | 52 | 144.95 | 409     | 3.78      | 79 | 349.00 | 230     | 2.13      |
| 26 | 88.05  | 377     | 3.49      | 53 | 166.05 | 493     | 4.56      | 80 | 376.00 | 215     | 1.99      |
| 27 | 89.05  | 1081    | 10.00     | 54 | 167.05 | 639     | 5.91      | 81 | 453.00 | 263     | 2.43      |
| 28 | 90.05  | 2287    | 21.15     | 55 | 168.05 | 1148    | 10.62     | 82 | 454.20 | 604     | 5.59      |
| 29 | 91.05  | 10811   | 100.00    | 56 | 169.15 | 688     | 6.36      | 83 | 455.20 | 425     | 3.93      |
| 30 | 92.05  | 1150    | 10.64     | 57 | 170.05 | 2031    | 18.79     | 84 | 456.25 | 1479    | 13.68     |
| 31 | 92.95  | 1429    | 13.22     | 58 | 171.10 | 802     | 7.42      | 85 | 457.20 | 1015    | 9.39      |
| 32 | 94.00  | 254     | 2.35      | 59 | 172.10 | 420     | 3.88      | 86 | 458.20 | 2169    | 20.06     |
| 33 | 95.00  | 354     | 3.27      | 60 | 194.05 | 863     | 7.98      | 87 | 459.15 | 562     | 5.20      |
| 34 | 104.00 | 249     | 2.30      | 61 | 195.05 | 858     | 7.94      | 88 | 460.15 | 2244    | 20.76     |
| 35 | 106.10 | 398     | 3.68      | 62 | 196.00 | 1993    | 18.43     | 89 | 461.15 | 521     | 4.82      |
| 36 | 107.00 | 444     | 4.11      | 63 | 197.05 | 575     | 5.32      | 90 | 462.10 | 618     | 5.72      |

Mass chart of compound 3

### Synthesis of methyl 2-amino-5-(methylselanyl) benzoate (**4**)<sup>1, 4</sup>

Compound **4** was synthesized from dimethyl 5,5'-diselanediybis (2-aminobenzoate) (**3**) (2 mmol, 916 mg) and methyl iodide (4.4 mmol, 0.27 mL). It was isolated as brown oil; yield: 402 mg (82%); R<sub>f</sub> = 0.6 (petroleum ether / ethyl acetate 4:2, v/v). IR (KBr):  $\nu$  3474 (N-H), 3364 (N-H), 2948 (C<sub>aliph</sub>-H), 2926 (C<sub>aliph</sub>-H), 1686 (C=O), 1607, 1292 (C<sub>Ar</sub>-N), 1110 (C-O), 815, 789, 696 (C-H bending), 559 (C-Se); <sup>1</sup>H NMR (400 MHz, DMSO- *d*<sub>6</sub>)  $\delta$  7.82 (s, 1H, Ar-H), 7.40 (d, J = 8.6 Hz, 1H, Ar-H), 6.77 (d, J = 8.6 Hz, 1H, Ar-H), 6.75 (s, 2H, NH<sub>2</sub>), 3.62 (s, 3H, OCH<sub>3</sub>), 2.22 (s, 3H, CH<sub>3</sub>). <sup>13</sup>C NMR (101 MHz, DMSO- *d*<sub>6</sub>)  $\delta$  167.70, 151.00, 138.90, 135.03, 118.21, 113.98, 109.87, 51.98, 9.17. MS (EI, 70 eV) *m/z* (%) = 245.10 (M, 100.0, base peak), 230 (38.06), 186 (10.46), 170 (35.08), 91 (91.10).

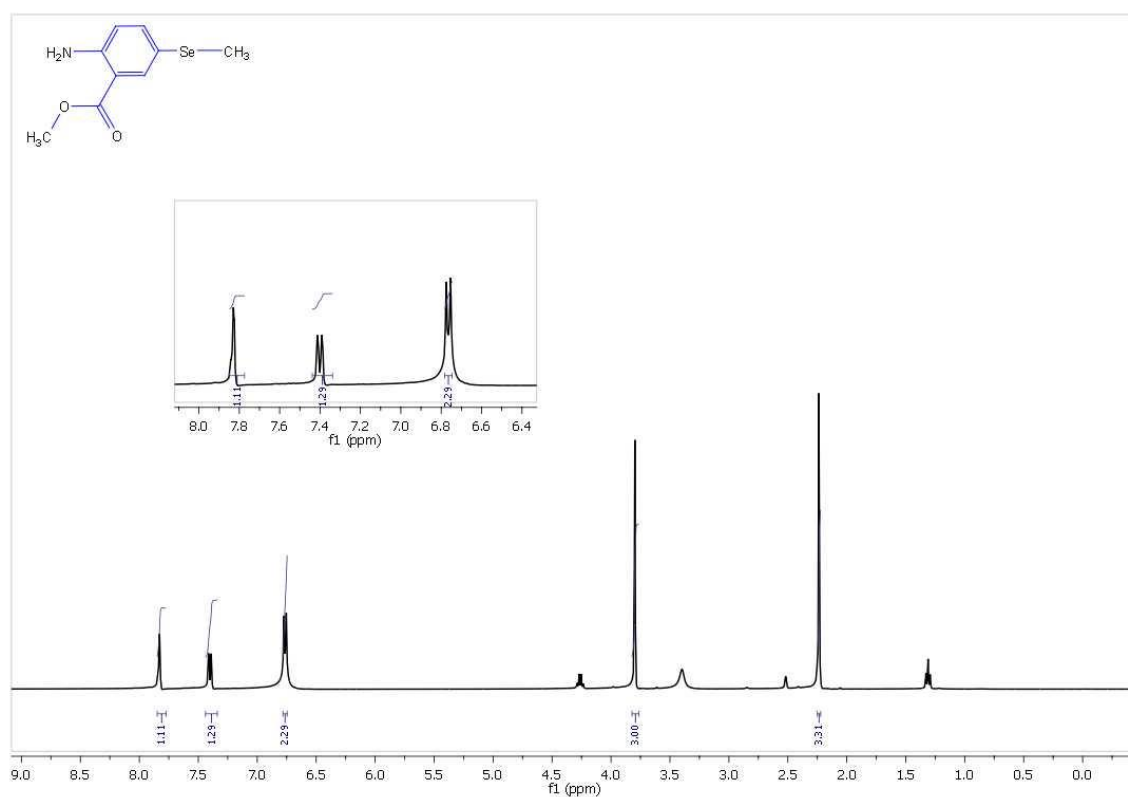

<sup>1</sup>H NMR chart of compound **4**

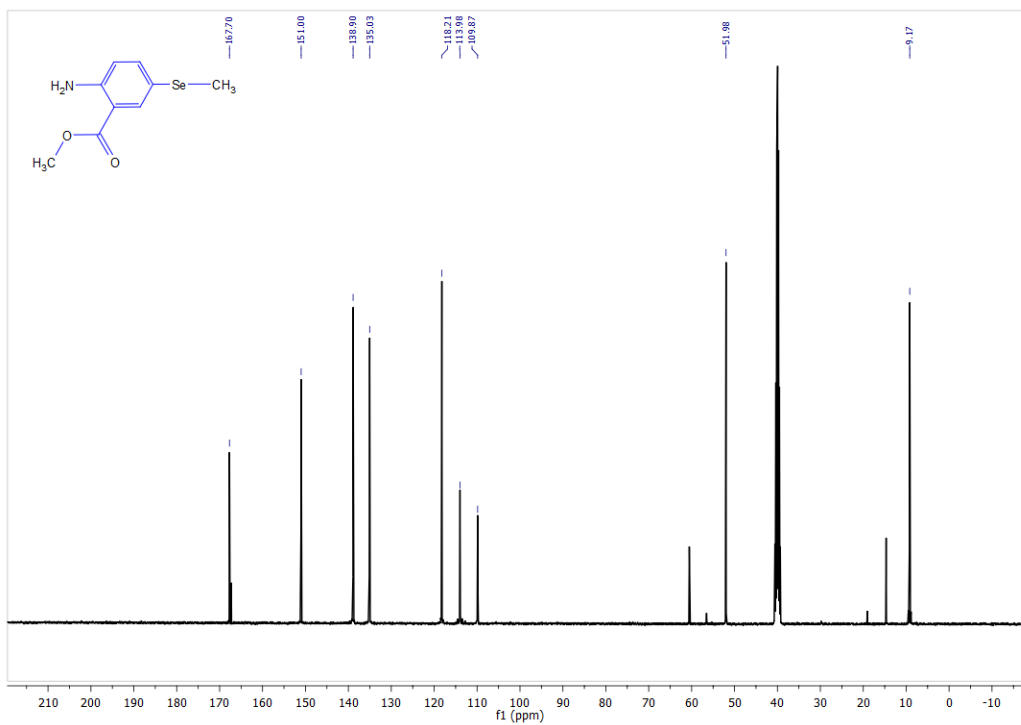

<sup>13</sup>C NMR chart of compound 4

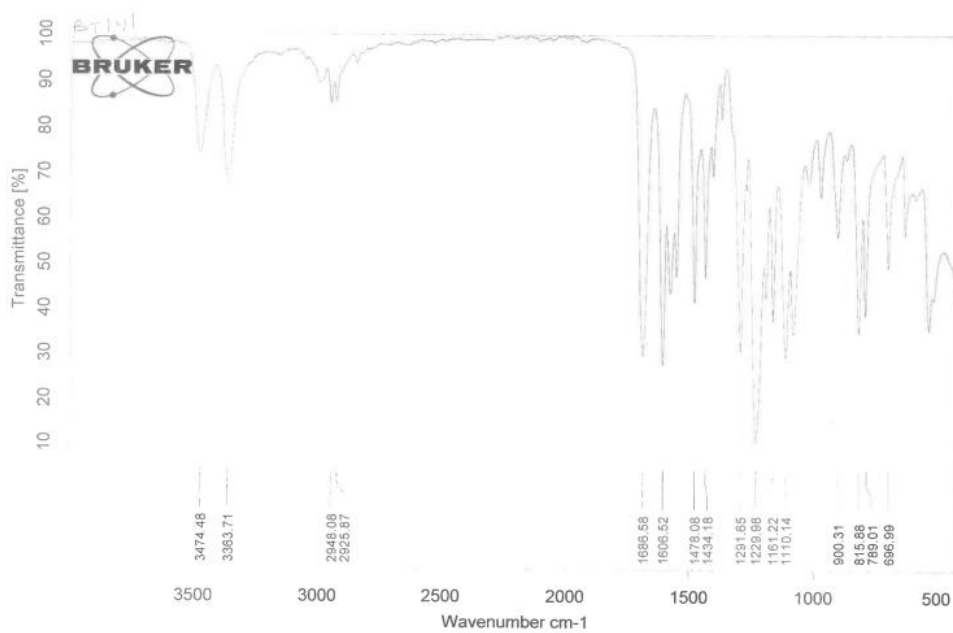

C:\Documents and Settings\adminuser\Desktop\New Folder (2)\test 1.1553

1

Instrument type and / or accessory

11/18/2021

IR chart of compound 4

**Cairo University  
Micro Analytical Center**

**DI Analysis  
Shimadzu Qp-2010 Plus**

Sample Information  
 Analyzed by : Dr. Mai Younis  
 Analyzed : 16/01/2007 03:02:11  
 Sample Name : B35  
 Sample ID :  
 Customer Name : Dr. Mohamed Soliman - Science - Cairo  
 Data File : C:\GCMSolution\Data\Project1\B35.QGD  
 Org Data File : C:\GCMSolution\Data\Project1\B35.QGD  
 Method File : C:\GCMSolution\Data\Project1\High Temperature Op  
 Org Method File : C:\GCMSolution\Data\Project1\High Temperature Op  
 Report File :  
 Tuning File : C:\GCMSolution\System\Tune1\_default.gct  
 ESI/ESI Modified by : Dr. Mai Younis  
 Modified : 16/01/2007 03:12:11

Method  
 Analytical Line 1  
 IonSourceTemp : 250.00 °C  
 [MS Table]  
 -Group 1 - Event 1-  
 Start Time : 0.00min  
 End Time : 10.00min  
 ACQ Mode : Scan  
 Event Time : 0.50sec  
 Scan Speed : 1000  
 Start m/z : 50.00  
 End m/z : 310.00  
 Electron Voltage : 70 eV  
 Ionization Mode : EI

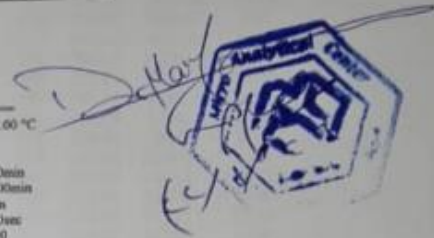

C:\GCMSolution\Data\Project1\B35.QGD

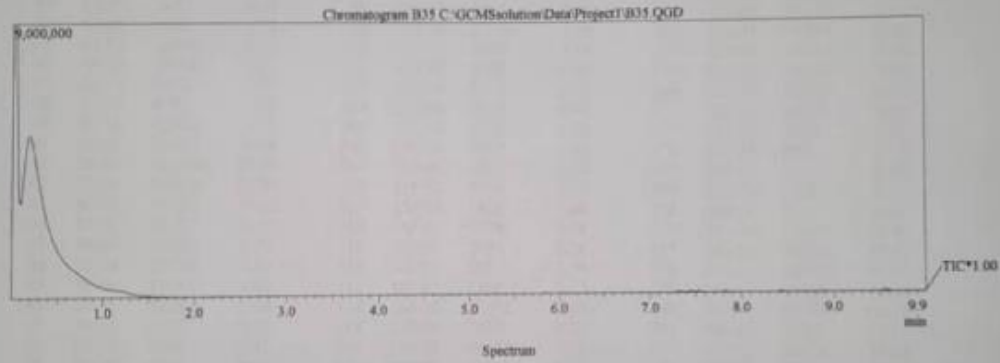

Line# 1 R.Time:0.2(Scan# 26)  
 MassPeaks:205  
 RawMode:Single 0.2(26) BasePeak:245(391154)  
 BG Mode:None Group 1 - Event 1

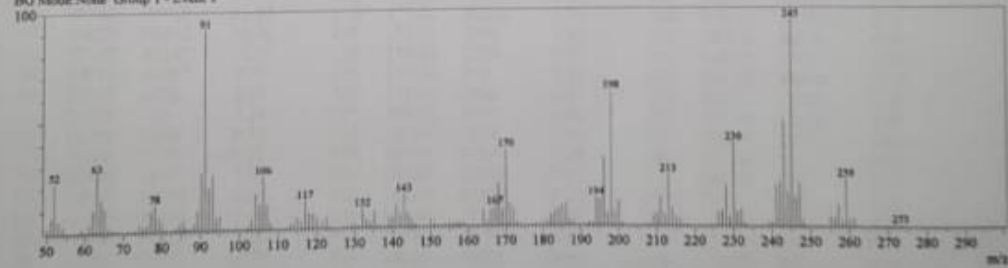

Mass Table  
 Line# 1 R.Time:0.2(Scan# 26)  
 MassPeaks:205  
 RawMode:Single 0.2(26) BasePeak:245(391154)  
 BG Mode:None Group 1 - Event 1

| # | m/z   | Abs. In | Rel. Int. | # | m/z   | Abs. In | Rel. Int. |
|---|-------|---------|-----------|---|-------|---------|-----------|
| 1 | 50.05 | 10411   | 2.66      | 4 | 53.00 | 21482   | 5.49      |
| 2 | 51.05 | 26260   | 6.71      | 5 | 54.05 | 11184   | 2.86      |
| 3 | 52.00 | 89298   | 22.83     | 6 | 55.00 | 2246    | 0.57      |
|   |       |         |           | 7 | 56.05 | 488     | 0.12      |
|   |       |         |           | 8 | 57.05 | 709     | 0.18      |
|   |       |         |           | 9 | 58.05 | 1164    | 0.30      |

Mass chart of compound 4

| #  | m/z    | Abs. In | Rel. Int. | #   | m/z    | Abs. In | Rel. Int. | #   | m/z    | Abs. In | Rel. Int. |
|----|--------|---------|-----------|-----|--------|---------|-----------|-----|--------|---------|-----------|
| 10 | 59.00  | 6150    | 1.57      | 76  | 126.05 | 2179    | 0.56      | 142 | 195.00 | 47017   | 12.02     |
| 11 | 60.05  | 1575    | 0.40      | 77  | 127.05 | 3204    | 0.82      | 143 | 196.00 | 122146  | 31.23     |
| 12 | 61.05  | 14415   | 3.69      | 78  | 128.00 | 4023    | 1.03      | 144 | 197.05 | 22307   | 5.70      |
| 13 | 62.05  | 39733   | 10.16     | 79  | 129.05 | 5617    | 1.44      | 145 | 198.00 | 241660  | 61.78     |
| 14 | 63.05  | 103836  | 26.55     | 80  | 130.00 | 7762    | 1.98      | 146 | 198.95 | 25629   | 6.55      |
| 15 | 64.05  | 57318   | 14.65     | 81  | 131.15 | 4478    | 1.14      | 147 | 200.00 | 43719   | 11.18     |
| 16 | 65.05  | 43819   | 11.20     | 82  | 132.10 | 33902   | 8.67      | 148 | 200.95 | 4204    | 1.07      |
| 17 | 66.10  | 9838    | 2.52      | 83  | 133.10 | 15628   | 4.00      | 149 | 201.95 | 533     | 0.14      |
| 18 | 67.05  | 4572    | 1.17      | 84  | 134.15 | 8746    | 2.24      | 150 | 207.00 | 2228    | 0.57      |
| 19 | 68.05  | 2933    | 0.75      | 85  | 135.10 | 31116   | 7.95      | 151 | 208.05 | 2526    | 0.65      |
| 20 | 69.10  | 1041    | 0.27      | 86  | 136.15 | 5476    | 1.40      | 152 | 209.05 | 20084   | 5.13      |
| 21 | 70.05  | 837     | 0.21      | 87  | 137.00 | 2783    | 0.71      | 153 | 210.05 | 23473   | 6.00      |
| 22 | 71.05  | 1646    | 0.42      | 88  | 138.05 | 3352    | 0.86      | 154 | 211.00 | 50268   | 12.85     |
| 23 | 72.05  | 1669    | 0.43      | 89  | 139.00 | 15473   | 3.96      | 155 | 212.05 | 22070   | 5.64      |
| 24 | 72.95  | 2952    | 0.75      | 90  | 140.00 | 17660   | 4.51      | 156 | 213.00 | 91327   | 23.35     |
| 25 | 74.05  | 12141   | 3.10      | 91  | 141.00 | 39022   | 9.98      | 157 | 214.00 | 31220   | 7.98      |
| 26 | 75.10  | 10198   | 2.61      | 92  | 142.05 | 21311   | 5.45      | 158 | 215.00 | 18164   | 4.64      |
| 27 | 76.10  | 12385   | 3.17      | 93  | 143.00 | 58711   | 15.01     | 159 | 216.00 | 12508   | 3.20      |
| 28 | 77.10  | 36498   | 9.33      | 94  | 144.00 | 25175   | 6.44      | 160 | 216.95 | 1191    | 0.30      |
| 29 | 78.05  | 47310   | 12.09     | 95  | 145.00 | 13801   | 3.53      | 161 | 218.00 | 1618    | 0.41      |
| 30 | 79.10  | 24441   | 6.25      | 96  | 146.00 | 5042    | 1.29      | 162 | 224.00 | 2599    | 0.66      |
| 31 | 80.00  | 15313   | 3.91      | 97  | 147.00 | 1039    | 0.27      | 163 | 225.05 | 1510    | 0.39      |
| 32 | 81.00  | 4794    | 1.23      | 98  | 148.10 | 804     | 0.21      | 164 | 226.05 | 26426   | 6.76      |
| 33 | 82.55  | 1873    | 0.48      | 99  | 149.15 | 1515    | 0.39      | 165 | 227.05 | 28172   | 7.20      |
| 34 | 83.55  | 6981    | 1.78      | 100 | 150.10 | 13154   | 3.36      | 166 | 228.05 | 72774   | 18.60     |
| 35 | 84.55  | 13095   | 3.35      | 101 | 151.10 | 4439    | 1.13      | 167 | 229.05 | 16399   | 4.19      |
| 36 | 85.50  | 19868   | 5.08      | 102 | 151.95 | 1797    | 0.46      | 168 | 230.05 | 148867  | 38.06     |
| 37 | 86.10  | 5970    | 1.53      | 103 | 153.00 | 3161    | 0.81      | 169 | 231.00 | 25292   | 6.47      |
| 38 | 87.05  | 4792    | 1.23      | 104 | 154.00 | 3514    | 0.90      | 170 | 232.05 | 29923   | 7.65      |
| 39 | 88.10  | 12948   | 3.31      | 105 | 155.00 | 5122    | 1.31      | 171 | 233.00 | 4730    | 1.21      |
| 40 | 89.10  | 37161   | 9.30      | 106 | 156.00 | 4514    | 1.15      | 172 | 233.95 | 605     | 0.15      |
| 41 | 90.15  | 101589  | 25.97     | 107 | 157.05 | 6492    | 1.66      | 173 | 238.15 | 734     | 0.19      |
| 42 | 91.10  | 358905  | 91.76     | 108 | 158.00 | 3975    | 1.02      | 174 | 239.10 | 6298    | 1.61      |
| 43 | 92.05  | 75198   | 19.22     | 109 | 159.00 | 5625    | 1.44      | 175 | 240.15 | 7887    | 2.02      |
| 44 | 93.00  | 97377   | 24.89     | 110 | 160.00 | 1470    | 0.38      | 176 | 241.10 | 72847   | 18.62     |
| 45 | 94.00  | 22561   | 5.77      | 111 | 161.00 | 1084    | 0.28      | 177 | 242.10 | 80234   | 20.51     |
| 46 | 95.00  | 26670   | 6.82      | 112 | 162.00 | 380     | 0.10      | 178 | 243.10 | 187193  | 47.86     |
| 47 | 96.00  | 4114    | 1.05      | 113 | 163.15 | 1307    | 0.33      | 179 | 244.15 | 60066   | 15.36     |
| 48 | 97.05  | 4225    | 1.08      | 114 | 164.10 | 28951   | 7.40      | 180 | 245.10 | 391154  | 100.00    |
| 49 | 98.35  | 2449    | 0.63      | 115 | 165.05 | 9689    | 2.48      | 181 | 246.05 | 51306   | 13.12     |
| 50 | 99.30  | 3386    | 0.87      | 116 | 166.00 | 30183   | 7.72      | 182 | 247.05 | 74480   | 19.04     |
| 51 | 100.25 | 1374    | 0.35      | 117 | 167.05 | 33926   | 8.67      | 183 | 248.05 | 8926    | 2.28      |
| 52 | 101.05 | 1757    | 0.45      | 118 | 168.00 | 75583   | 19.32     | 184 | 249.05 | 953     | 0.24      |
| 53 | 102.10 | 5450    | 1.39      | 119 | 169.05 | 30276   | 7.74      | 185 | 253.10 | 1460    | 0.37      |
| 54 | 103.15 | 15671   | 4.01      | 120 | 170.00 | 137220  | 35.08     | 186 | 254.15 | 1011    | 0.26      |
| 55 | 104.15 | 62814   | 16.06     | 121 | 171.00 | 40180   | 10.27     | 187 | 255.10 | 15329   | 3.92      |
| 56 | 105.25 | 45718   | 11.69     | 122 | 172.00 | 30348   | 7.76      | 188 | 256.15 | 16105   | 4.12      |
| 57 | 106.20 | 94842   | 24.25     | 123 | 173.00 | 7290    | 1.86      | 189 | 257.10 | 40538   | 10.36     |
| 58 | 107.15 | 45188   | 11.55     | 124 | 174.00 | 1239    | 0.32      | 190 | 258.15 | 9549    | 2.44      |
| 59 | 108.15 | 10687   | 2.73      | 125 | 177.20 | 238     | 0.06      | 191 | 259.10 | 84319   | 21.56     |
| 60 | 109.05 | 2089    | 0.53      | 126 | 178.15 | 3162    | 0.81      | 192 | 260.05 | 12047   | 3.08      |
| 61 | 110.05 | 710     | 0.18      | 127 | 179.05 | 1817    | 0.46      | 193 | 261.10 | 15478   | 3.96      |
| 62 | 111.05 | 1314    | 0.34      | 128 | 180.00 | 3514    | 0.90      | 194 | 262.05 | 2350    | 0.60      |
| 63 | 112.05 | 1199    | 0.31      | 129 | 181.05 | 9794    | 2.50      | 195 | 263.05 | 335     | 0.09      |
| 64 | 113.00 | 7610    | 1.95      | 130 | 182.00 | 19970   | 5.11      | 196 | 264.10 | 220     | 0.06      |
| 65 | 114.00 | 10354   | 2.65      | 131 | 183.00 | 25158   | 6.43      | 197 | 269.15 | 730     | 0.19      |
| 66 | 115.00 | 21430   | 5.48      | 132 | 184.00 | 31201   | 7.98      | 198 | 270.15 | 629     | 0.16      |
| 67 | 116.05 | 12818   | 3.28      | 133 | 185.00 | 38050   | 9.73      | 199 | 271.15 | 1493    | 0.38      |
| 68 | 117.05 | 50031   | 12.79     | 134 | 186.00 | 40924   | 10.46     | 200 | 272.25 | 533     | 0.14      |
| 69 | 118.05 | 27671   | 7.07      | 135 | 187.00 | 10028   | 2.56      | 201 | 273.15 | 2823    | 0.72      |
| 70 | 119.10 | 26692   | 6.82      | 136 | 188.00 | 6714    | 1.72      | 202 | 274.20 | 558     | 0.14      |
| 71 | 120.10 | 18391   | 4.70      | 137 | 189.00 | 868     | 0.22      | 203 | 275.20 | 654     | 0.17      |
| 72 | 121.55 | 12099   | 3.09      | 138 | 191.05 | 296     | 0.08      | 204 | 276.20 | 290     | 0.07      |
| 73 | 122.60 | 19750   | 5.05      | 139 | 192.00 | 4826    | 1.23      | 205 | 277.10 | 369     | 0.09      |
| 74 | 123.55 | 4338    | 1.11      | 140 | 193.05 | 2875    | 0.74      |     |        |         |           |
| 75 | 125.05 | 1061    | 0.27      | 141 | 194.00 | 49812   | 12.73     |     |        |         |           |

Mass chart of compound 4

### Synthesis of methyl 2-amino-5-(benzylselanyl) benzoate (**5**)<sup>1, 4</sup>

Compound **5** was synthesized from dimethyl 5,5'-diselanediybis(2-aminobenzoate) (**3**) (2 mmol, 916 mg) and benzyl chloride (4.4 mmol, 0.50 mL). It was isolated as light brown solid; yield: 597 mg (93%); m.p. = 78 °C; Rf = 0.6 (petroleum ether / ethyl acetate 4:3, v/v). IR (KBr):  $\nu$  3462 (N-H), 3353 (N-H), 2977 (C<sub>aliph</sub>-H), 2946 (C<sub>aliph</sub>-H), 1672 (C=O), 1621, 1436, 1234 (C<sub>Ar</sub>-N), 1114 (C-O), 810 (C-H bending), 692 (C-H rocking), 595 (C-Se); <sup>1</sup>H NMR (400 MHz, DMSO- *d*<sub>6</sub>)  $\delta$  7.70 (s, 1H, Ar-H), 7.30 (d, J = 8.6 Hz, 1H, Ar-H), 7.23 (dd, J = 8.6 Hz, J = 2.1 Hz, 2H, Ar-H), 7.19 (d, J = 8.7 Hz, 2H, Ar-H), 7.14 (d, J = 8.6 Hz, 2H, Ar-H), 6.82 (s, 2H, NH<sub>2</sub>), 4.00 (s, 2H, SeCH<sub>2</sub>), 3.77 (s, 3H, OCH<sub>3</sub>); <sup>13</sup>C NMR (101 MHz, DMSO- *d*<sub>6</sub>)  $\delta$  167.69, 151.53, 141.06, 139.66, 137.95, 129.24, 128.65, 126.98, 117.87, 112.42, 109.68, 51.94, 32.75. MS (EI, 70 ev) *m/z* (%) = 321.20 (M, 46.87), 244.10 (2.77), 230 (34.88), 150.15 (1.02), 91.05 (100.0, base peak).

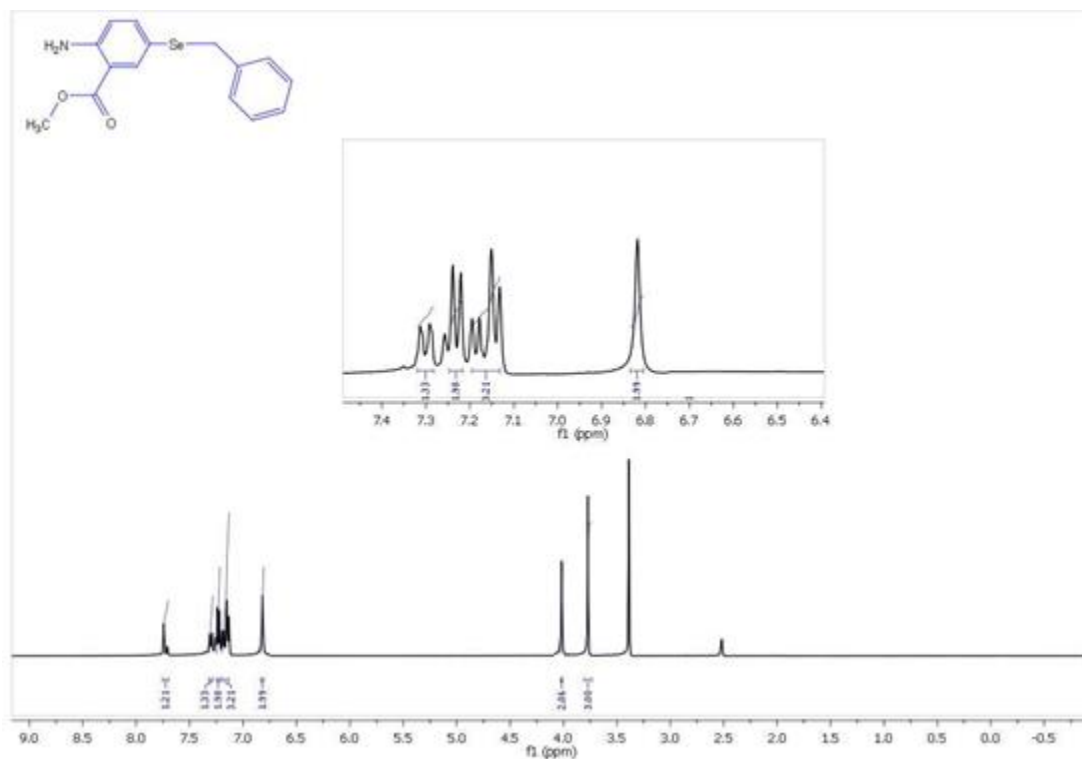

<sup>1</sup>H NMR chart of compound **5**

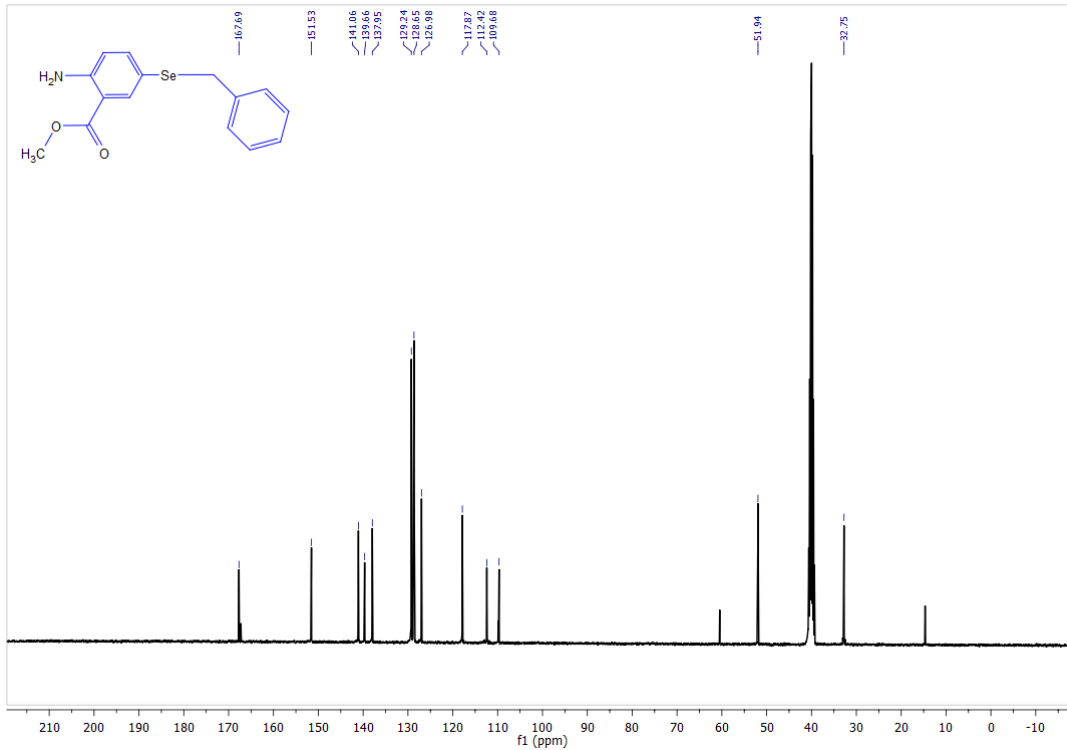

$^{13}\text{C}$  NMR chart of compound 5

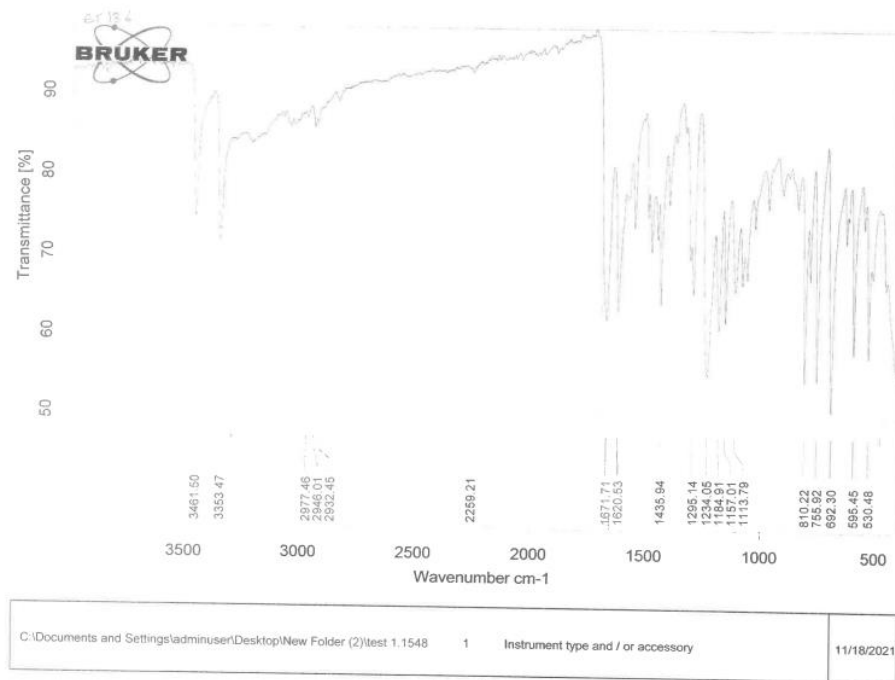

IR chart of compound 5



**Cairo University  
Micro Analytical Center**

**DI Analysis  
Shimadzu Qp-2010 Plus**

Sample Information  
 Analyzed by: Dr. Mai Younis  
 Analyzed: 06/01/2007 07:49:46  
 Sample Name: B22  
 Sample ID:  
 Customer Name: Dr. Mohamed Soliman - Science - Cairo  
 Data File: C:\GCMSolution\Data\Project1\B22.QGD  
 Org Data File: C:\GCMSolution\Data\Project1\B22.QGD  
 Method File: C:\GCMSolution\Data\Project1\High Temperature Op  
 Org Method File: C:\GCMSolution\Data\Project1\High Temperature Op  
 Report File:  
 Tuning File: C:\GCMSolution\System1\Tune1\_default.gct  
 \$EndISModified by: Dr. Mai Younis  
 Modified: 06/01/2007 07:51:49

Method  
 Analytical Line 1  
 IonSourceTemp: 250.00 °C  
 [MS Table]  
 --Group 1 - Event 1--  
 Start Time: 0.00min  
 End Time: 10.00min  
 ACQ Mode: Scan  
 Event Time: 0.50sec  
 Scan Speed: 1600  
 Start m/z: 50.00  
 End m/z: 510.00  
 Electron Voltage: 70 eV  
 Ionization Mode: EI

C:\GCMSolution\Data\Project1\B22.QGD

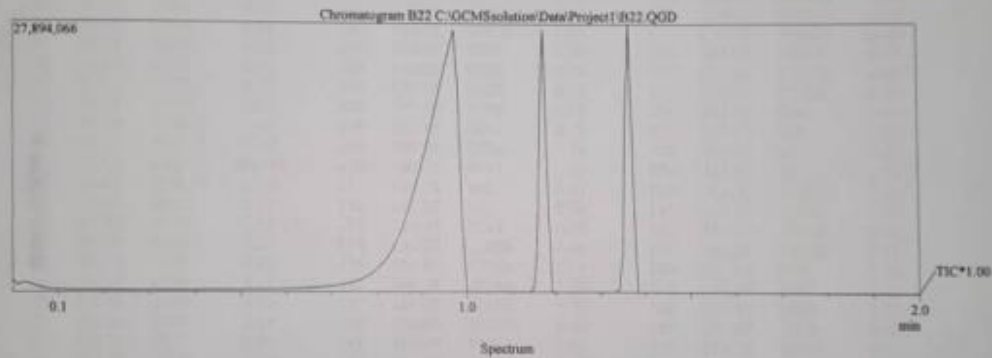

Line# 1 R.Time: 1.2(Scan#: 143)  
 MassPeaks: 244(Peak Elimination m/z: 423.20, 425.30)  
 RawMode: Single 1.2(143) BasePeak: 91(2025185)  
 BG Mode: None Group 1 - Event 1

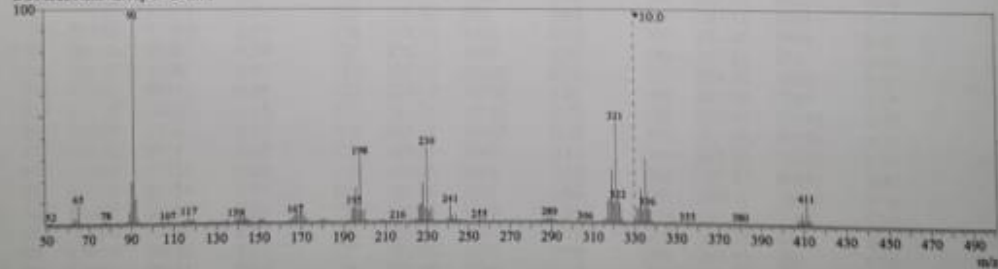

Mass Table  
 Line# 1 R.Time: 1.2(Scan#: 143)  
 MassPeaks: 244(Peak Elimination m/z: 423.20, 425.30)  
 RawMode: Single 1.2(143) BasePeak: 91(2025185)  
 BG Mode: None Group 1 - Event 1

| # | m/z   | Abs. In | Rel. Int. | # | m/z   | Abs. In | Rel. Int. | # | m/z   | Abs. In | Rel. Int. |
|---|-------|---------|-----------|---|-------|---------|-----------|---|-------|---------|-----------|
| 1 | 50.05 | 5073    | 0.25      | 4 | 52.95 | 3146    | 0.16      | 7 | 57.00 | 1097    | 0.05      |
| 2 | 51.00 | 11465   | 0.57      | 5 | 54.00 | 1751    | 0.09      | 8 | 58.05 | 483     | 0.02      |
| 3 | 52.00 | 13521   | 0.67      | 6 | 55.00 | 583     | 0.03      | 9 | 59.00 | 2993    | 0.15      |

Mass chart of compound 5

| #  | m/z    | Abs. In | Rel. Int. | #   | m/z    | Abs. In | Rel. Int. | #   | m/z    | Abs. In | Rel. Int. |
|----|--------|---------|-----------|-----|--------|---------|-----------|-----|--------|---------|-----------|
| 10 | 60.05  | 391     | 0.02      | 79  | 129.05 | 9313    | 0.46      | 148 | 201.95 | 1028    | 0.05      |
| 11 | 61.05  | 3772    | 0.19      | 80  | 130.05 | 11086   | 0.55      | 149 | 204.25 | 5464    | 0.27      |
| 12 | 62.05  | 17107   | 0.84      | 81  | 131.10 | 5054    | 0.25      | 150 | 205.15 | 701     | 0.03      |
| 13 | 63.00  | 56926   | 2.81      | 82  | 132.05 | 10987   | 0.54      | 151 | 206.20 | 1020    | 0.05      |
| 14 | 64.05  | 36812   | 1.82      | 83  | 133.10 | 3684    | 0.18      | 152 | 207.25 | 2877    | 0.14      |
| 15 | 65.00  | 176463  | 8.71      | 84  | 134.15 | 9264    | 0.46      | 153 | 208.20 | 14284   | 0.71      |
| 16 | 65.95  | 12878   | 0.64      | 85  | 135.05 | 30121   | 1.49      | 154 | 209.15 | 17645   | 0.87      |
| 17 | 67.00  | 1580    | 0.08      | 86  | 136.05 | 4109    | 0.20      | 155 | 210.05 | 5896    | 0.29      |
| 18 | 68.05  | 483     | 0.02      | 87  | 137.05 | 5343    | 0.26      | 156 | 211.15 | 1898    | 0.09      |
| 19 | 69.10  | 985     | 0.05      | 88  | 138.05 | 7879    | 0.39      | 157 | 212.05 | 5471    | 0.27      |
| 20 | 70.10  | 1497    | 0.07      | 89  | 139.00 | 35607   | 1.76      | 158 | 213.10 | 2154    | 0.11      |
| 21 | 71.10  | 1663    | 0.08      | 90  | 140.05 | 41787   | 2.06      | 159 | 214.05 | 4336    | 0.21      |
| 22 | 72.05  | 379     | 0.02      | 91  | 141.00 | 77244   | 3.81      | 160 | 215.15 | 994     | 0.05      |
| 23 | 73.05  | 2080    | 0.10      | 92  | 142.05 | 47101   | 2.33      | 161 | 216.10 | 6855    | 0.34      |
| 24 | 74.05  | 4921    | 0.24      | 93  | 142.95 | 126529  | 6.25      | 162 | 217.05 | 395     | 0.02      |
| 25 | 75.05  | 5212    | 0.26      | 94  | 143.95 | 48735   | 2.41      | 163 | 218.10 | 921     | 0.05      |
| 26 | 76.05  | 6114    | 0.30      | 95  | 144.95 | 28945   | 1.43      | 164 | 221.20 | 846     | 0.04      |
| 27 | 77.05  | 10886   | 0.54      | 96  | 146.05 | 23129   | 1.14      | 165 | 223.15 | 1595    | 0.08      |
| 28 | 78.05  | 20811   | 1.03      | 97  | 146.95 | 4067    | 0.20      | 166 | 224.10 | 14468   | 0.71      |
| 29 | 79.05  | 8101    | 0.40      | 98  | 148.15 | 1843    | 0.09      | 167 | 225.15 | 19403   | 0.96      |
| 30 | 80.00  | 5090    | 0.25      | 99  | 149.15 | 8597    | 0.42      | 168 | 226.10 | 153471  | 7.58      |
| 31 | 81.05  | 1605    | 0.08      | 100 | 150.15 | 20578   | 1.02      | 169 | 227.15 | 166163  | 8.20      |
| 32 | 82.15  | 1045    | 0.05      | 101 | 151.05 | 33271   | 1.64      | 170 | 228.10 | 368934  | 18.22     |
| 33 | 83.10  | 2590    | 0.13      | 102 | 152.05 | 32505   | 1.61      | 171 | 229.15 | 120571  | 5.95      |
| 34 | 84.15  | 2599    | 0.13      | 103 | 153.05 | 20872   | 1.03      | 172 | 230.10 | 706377  | 34.88     |
| 35 | 85.15  | 4470    | 0.22      | 104 | 154.05 | 7855    | 0.39      | 173 | 231.05 | 94541   | 4.67      |
| 36 | 86.05  | 4174    | 0.21      | 105 | 155.00 | 4855    | 0.24      | 174 | 232.10 | 132870  | 6.56      |
| 37 | 87.15  | 6312    | 0.31      | 106 | 155.95 | 3585    | 0.18      | 175 | 233.05 | 15116   | 0.75      |
| 38 | 88.15  | 20787   | 1.03      | 107 | 157.00 | 3398    | 0.17      | 176 | 234.05 | 960     | 0.05      |
| 39 | 89.15  | 110480  | 5.46      | 108 | 157.95 | 2693    | 0.13      | 177 | 238.15 | 969     | 0.05      |
| 40 | 90.15  | 391518  | 19.33     | 109 | 159.05 | 2274    | 0.11      | 178 | 239.25 | 4131    | 0.20      |
| 41 | 91.05  | 202518  | 100.00    | 110 | 160.05 | 4165    | 0.21      | 179 | 240.25 | 35113   | 1.73      |
| 42 | 92.05  | 228419  | 11.28     | 111 | 161.00 | 602     | 0.03      | 180 | 241.25 | 155831  | 7.69      |
| 43 | 93.05  | 46032   | 2.27      | 112 | 162.05 | 482     | 0.02      | 181 | 242.10 | 54386   | 2.69      |
| 44 | 94.00  | 4180    | 0.21      | 113 | 163.05 | 3714    | 0.18      | 182 | 243.15 | 12588   | 0.62      |
| 45 | 95.00  | 8522    | 0.42      | 114 | 164.05 | 12889   | 0.64      | 183 | 244.10 | 56178   | 2.77      |
| 46 | 96.15  | 1388    | 0.07      | 115 | 165.05 | 22436   | 1.11      | 184 | 245.05 | 8044    | 0.40      |
| 47 | 97.10  | 2596    | 0.13      | 116 | 166.05 | 47284   | 2.33      | 185 | 246.10 | 9770    | 0.48      |
| 48 | 98.10  | 2490    | 0.12      | 117 | 167.05 | 66556   | 3.29      | 186 | 247.10 | 1503    | 0.07      |
| 49 | 99.10  | 2721    | 0.13      | 118 | 168.00 | 102111  | 5.04      | 187 | 254.35 | 1823    | 0.09      |
| 50 | 100.15 | 911     | 0.04      | 119 | 169.05 | 77098   | 3.81      | 188 | 255.25 | 10721   | 0.53      |
| 51 | 101.10 | 2750    | 0.14      | 120 | 169.95 | 174770  | 8.63      | 189 | 256.15 | 3888    | 0.19      |
| 52 | 102.10 | 4402    | 0.22      | 121 | 170.95 | 74461   | 3.68      | 190 | 257.15 | 1891    | 0.09      |
| 53 | 103.10 | 7242    | 0.36      | 122 | 172.00 | 39018   | 1.93      | 191 | 258.15 | 4289    | 0.21      |
| 54 | 104.05 | 11796   | 0.58      | 123 | 172.95 | 11808   | 0.58      | 192 | 259.15 | 3074    | 0.15      |
| 55 | 105.05 | 7012    | 0.35      | 124 | 173.95 | 1305    | 0.06      | 193 | 260.15 | 2910    | 0.14      |
| 56 | 106.10 | 11636   | 0.57      | 125 | 176.15 | 889     | 0.04      | 194 | 261.15 | 2231    | 0.11      |
| 57 | 107.05 | 13258   | 0.65      | 126 | 177.15 | 2401    | 0.12      | 195 | 262.20 | 1594    | 0.08      |
| 58 | 108.00 | 3873    | 0.19      | 127 | 178.15 | 5969    | 0.29      | 196 | 283.25 | 376     | 0.02      |
| 59 | 109.15 | 1378    | 0.07      | 128 | 179.15 | 10187   | 0.50      | 197 | 284.25 | 1803    | 0.09      |
| 60 | 110.05 | 979     | 0.05      | 129 | 180.15 | 36701   | 1.81      | 198 | 285.20 | 7185    | 0.35      |
| 61 | 111.05 | 2440    | 0.12      | 130 | 181.10 | 18865   | 0.93      | 199 | 286.20 | 14742   | 0.73      |
| 62 | 112.05 | 2793    | 0.14      | 131 | 182.15 | 14965   | 0.74      | 200 | 287.15 | 23239   | 1.15      |
| 63 | 113.05 | 9979    | 0.49      | 132 | 183.05 | 3441    | 0.17      | 201 | 288.20 | 24534   | 1.21      |
| 64 | 114.05 | 12822   | 0.63      | 133 | 184.00 | 2350    | 0.12      | 202 | 289.15 | 36611   | 1.81      |
| 65 | 115.00 | 27724   | 1.37      | 134 | 185.10 | 1281    | 0.06      | 203 | 290.15 | 36028   | 1.78      |
| 66 | 116.05 | 18052   | 0.89      | 135 | 186.05 | 1167    | 0.06      | 204 | 291.10 | 11612   | 0.57      |
| 67 | 117.00 | 53988   | 2.67      | 136 | 190.05 | 602     | 0.03      | 205 | 292.15 | 6462    | 0.32      |
| 68 | 118.05 | 26835   | 1.33      | 137 | 191.05 | 1736    | 0.09      | 206 | 293.15 | 552     | 0.03      |
| 69 | 119.05 | 43451   | 2.15      | 138 | 192.05 | 12467   | 0.62      | 207 | 306.20 | 302     | 0.01      |
| 70 | 120.05 | 15785   | 0.78      | 139 | 193.05 | 17901   | 0.88      | 208 | 308.10 | 636     | 0.03      |
| 71 | 121.10 | 4878    | 0.24      | 140 | 194.05 | 131489  | 6.49      | 209 | 310.05 | 707     | 0.03      |
| 72 | 122.05 | 2063    | 0.10      | 141 | 195.05 | 146464  | 7.23      | 210 | 314.25 | 1728    | 0.09      |
| 73 | 123.10 | 1527    | 0.08      | 142 | 196.00 | 323593  | 15.98     | 211 | 315.20 | 18481   | 0.91      |
| 74 | 124.05 | 682     | 0.03      | 143 | 197.05 | 113333  | 5.60      | 212 | 316.25 | 23945   | 1.18      |
| 75 | 125.05 | 4002    | 0.20      | 144 | 198.00 | 620129  | 30.62     | 213 | 317.20 | 196281  | 9.69      |
| 76 | 126.05 | 5459    | 0.27      | 145 | 198.95 | 99120   | 4.89      | 214 | 318.25 | 227987  | 11.26     |
| 77 | 127.05 | 10480   | 0.52      | 146 | 200.00 | 113441  | 5.60      | 215 | 319.20 | 494574  | 24.42     |
| 78 | 128.05 | 10844   | 0.54      | 147 | 200.95 | 16159   | 0.80      | 216 | 320.25 | 188395  | 9.30      |

| #   | m/z    | Abs. In | Rel. Int. | #   | m/z    | Abs. In | Rel. Int. | #   | m/z    | Abs. In | Rel. Int. |
|-----|--------|---------|-----------|-----|--------|---------|-----------|-----|--------|---------|-----------|
| 217 | 321.20 | 949119  | 46.87     | 227 | 334.25 | 12617   | 0.62      | 237 | 407.30 | 3812    | 0.19      |
| 218 | 322.15 | 206457  | 10.19     | 228 | 335.20 | 61590   | 3.04      | 238 | 408.35 | 4545    | 0.22      |
| 219 | 323.15 | 182324  | 9.00      | 229 | 336.15 | 14251   | 0.70      | 239 | 409.25 | 10425   | 0.51      |
| 220 | 324.05 | 37472   | 1.85      | 230 | 337.20 | 12284   | 0.61      | 240 | 410.35 | 4385    | 0.22      |
| 221 | 325.05 | 4024    | 0.20      | 231 | 338.15 | 2137    | 0.11      | 241 | 411.25 | 19850   | 0.98      |
| 222 | 329.25 | 824     | 0.04      | 232 | 347.20 | 470     | 0.02      | 242 | 412.25 | 5834    | 0.29      |
| 223 | 330.25 | 1720    | 0.08      | 233 | 349.20 | 1524    | 0.08      | 243 | 413.25 | 4131    | 0.20      |
| 224 | 331.20 | 13207   | 0.65      | 234 | 355.20 | 474     | 0.02      | 244 | 414.15 | 786     | 0.04      |
| 225 | 332.25 | 14297   | 0.71      | 235 | 378.20 | 226     | 0.01      |     |        |         |           |
| 226 | 333.20 | 31734   | 1.57      | 236 | 380.20 | 604     | 0.03      |     |        |         |           |

Mass chart of compound 5

**Synthesis of methyl 2-amino-5-((2-oxo-2-(phenylamino) ethyl) selanyl) benzoate (6)<sup>1, 4</sup>**

Compound **6** was synthesized from dimethyl 5,5'-diselanediybis (2-aminobenzoate) (**3**) (2.0 mmol, 916 mg) and 2-chloro-*N*-phenylacetamide (4.4 mmol, 744 mg). It was isolated as violet solid; yield: 699 mg (96%); m.p. = 126–128 °C; R<sub>f</sub> = 0.50 (petroleum ether / ethyl acetate 4:2, v/v). IR (KBr):  $\nu$  3466 (N-H), 3354 (N-H), 3246 (N-H), 2945 (C<sub>aliph</sub>-H), 1678, 1594 (C=O), 1542 (C=C), 1439, 1238 (C<sub>Ar</sub>-N), 1090 (C-O), 752 (C-H bending), 695, 552 (C-Se), 539 (C-H rocking); <sup>1</sup>H NMR (400 MHz, DMSO- *d*<sub>6</sub>)  $\delta$  9.99 (s, 1H, NH), 7.96 (s, 1H, Ar-H), 7.53 (d, J = 8.6 Hz, 2H, ArH), 7.48 (d, J = 8.6 Hz, 1H, ArH), 7.30 (dd, J = 8.6 Hz, J = 2.1 Hz, 2H, Ar-H), 7.04 (t, 1H, J = 8.6 Hz, Ar-H), 6.86 (s, 2H, NH<sub>2</sub>), 6.75 (d, J = 8.6 Hz, 1H, Ar-H), 3.74 (s, 3H, OCH<sub>3</sub>), 3.42 (s, 2H, SeCH<sub>2</sub>); <sup>13</sup>C NMR (101 MHz, DMSO- *d*<sub>6</sub>)  $\delta$  168.65, 167.65, 151.81, 141.13, 139.49, 138.20, 129.14, 123.74, 119.62, 117.89, 111, 109.71, 51.93, 32.33. MS (EI, 70 ev) *m/z* (%) = 364.20 (M, 100.0, base peak), 230 (40.48), 91.10 (31), 77.05 (24.13), 59 (14.56).

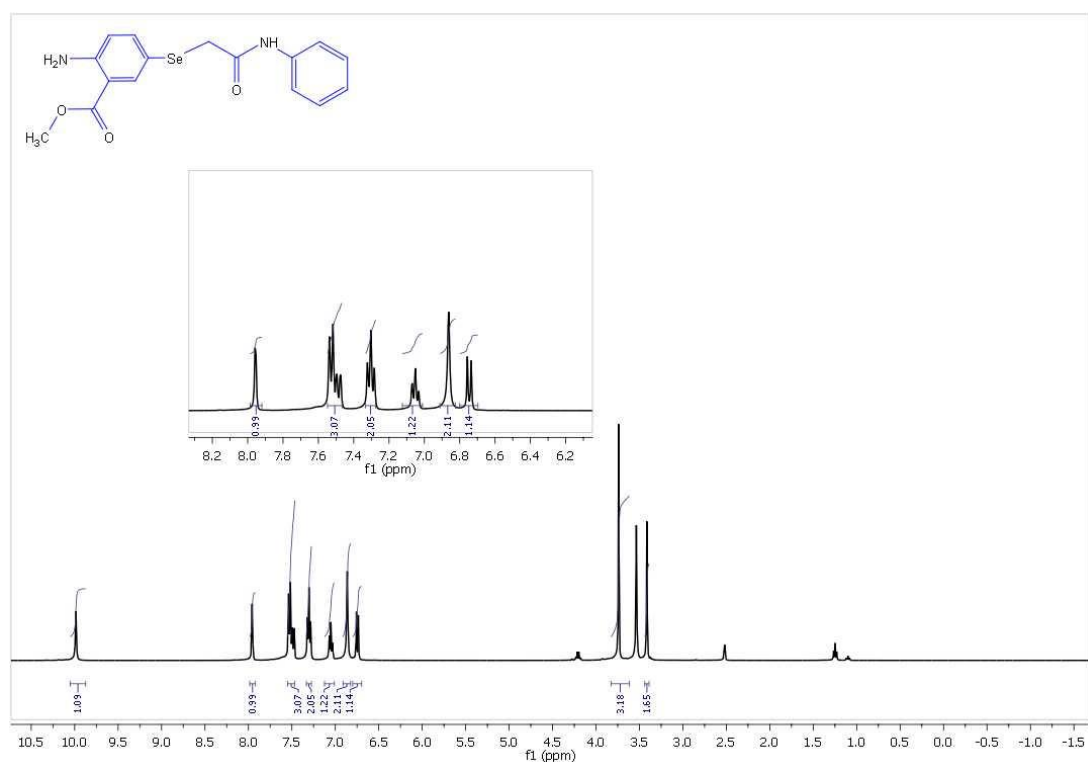

<sup>1</sup>H NMR chart of compound **6**

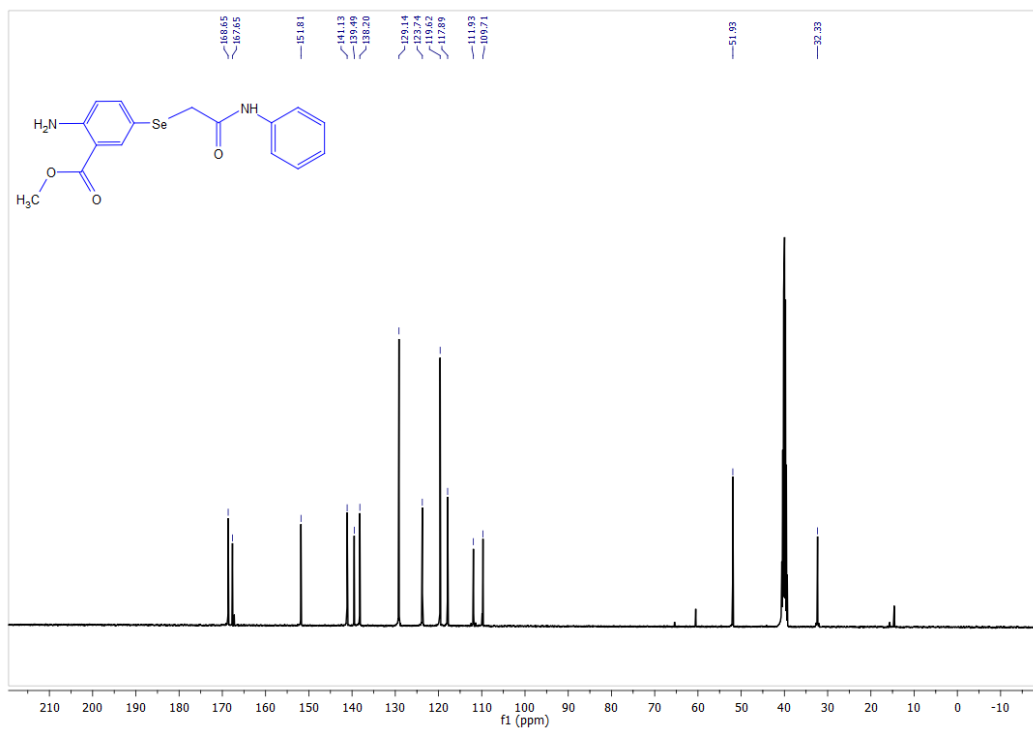

<sup>13</sup>C NMR chart of compound 6

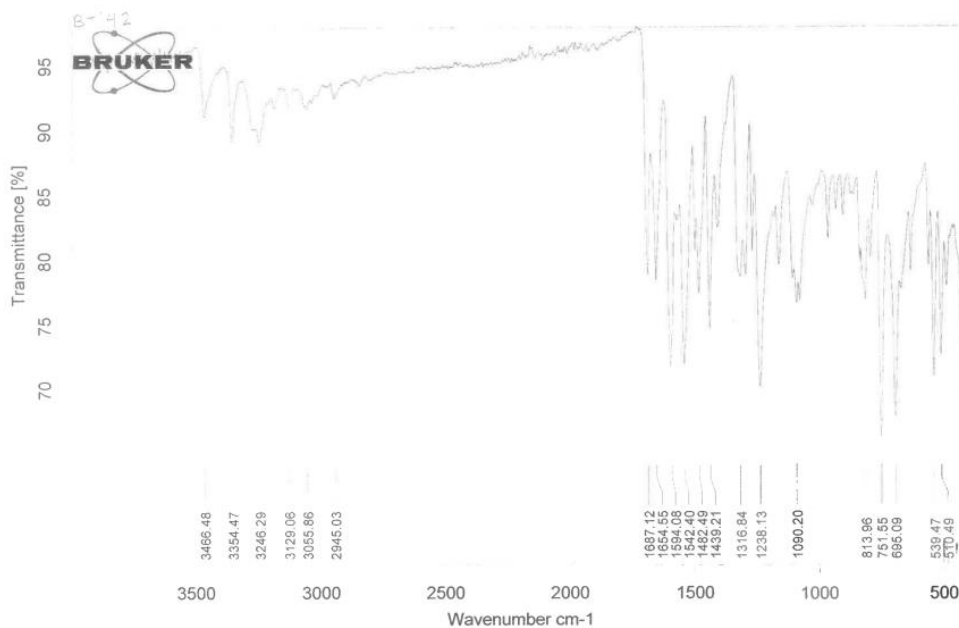

C:\Documents and Settings\adminuser\Desktop\New Folder (2)\test 1.1549

1

Instrument type and / or accessory

11/18/2021

**Cairo University  
Micro Analytical Center**

**DI Analysis  
Shimadzu Qp-2010 Plus**

Sample Information  
 Analyzed by: Dr. Mai Younis  
 Analyzed: 06/01/2007 08:03:42  
 Sample Name: B23  
 Sample ID:  
 Customer Name: Dr. Mohamed Soliman - Science - Cairo  
 Data File: C:\GCMSolution\Data\Project1\B23.QGD  
 Orig. Data File: C:\GCMSolution\Data\Project1\B23.QGD  
 Method File: C:\GCMSolution\Data\Project1\High Temperature Op  
 Orig. Method File: C:\GCMSolution\Data\Project1\High Temperature Op  
 Report File:  
 Tuning File: C:\GCMSolution\System\Tune1\_default.gcf  
 \$EndID\$ Modified by: Dr. Mai Younis  
 Modified: 06/01/2007 08:06:25

Method  
 Analytical Line 1  
 IonSourceTemp: 250.00 °C  
 [MS Table]  
 -Group 1 - Event 1-  
 Start Time: 0:00min  
 End Time: 10:00min  
 Scan: Scan  
 ACQ Mode: Scan  
 Event Time: 0:50min  
 Scan Speed: 1000  
 Start m/z: 50.00  
 End m/z: 410.00  
 Electron Voltage: 70 eV  
 Ionization Mode: EI

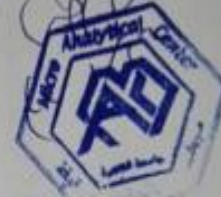

C:\GCMSolution\Data\Project1\B23.QGD

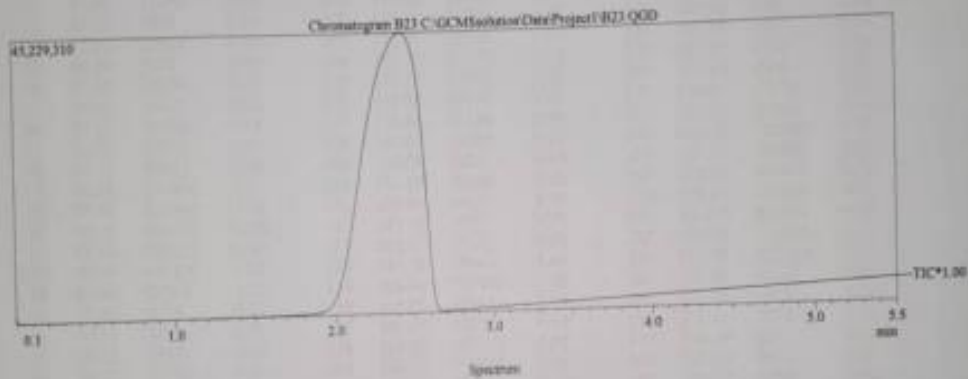

Line# 1 R.Time:2.6(Scan# 309)  
 MassPeaks:395(Peak Elimination m/z: 467.40, 468.40, 469.60, 473.60, 487.60)  
 RawMode:Single 2.6(309) BasePeak:364(2220999)  
 BG Mode:None Group 1 - Event 1

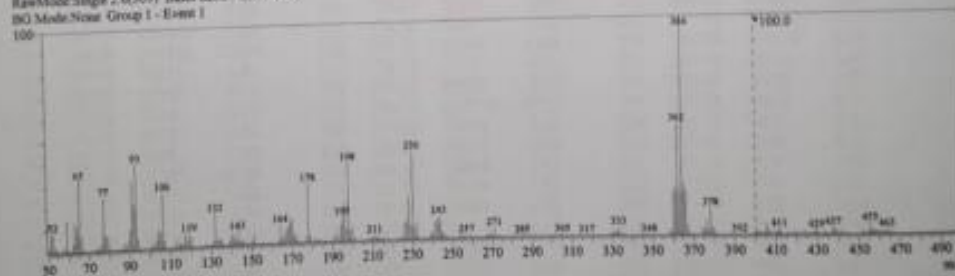

Mass Table  
 Line# 1 R.Time:2.6(Scan# 309)  
 MassPeaks:395(Peak Elimination m/z: 467.40, 468.40, 469.60, 473.60, 487.60)  
 RawMode:Single 2.6(309) BasePeak:364(2220999)  
 BG Mode:None Group 1 - Event 1

| # | m/z   | Abs. In | Rel. Int. | # | m/z   | Abs. In | Rel. Int. |
|---|-------|---------|-----------|---|-------|---------|-----------|
| 1 | 50.05 | 51768   | 2.33      | 4 | 53.00 | 56865   | 2.56      |
| 2 | 51.00 | 187841  | 8.46      | 5 | 54.00 | 39409   | 1.77      |
| 3 | 52.00 | 198514  | 8.94      | 6 | 55.00 | 21300   | 0.96      |
|   |       |         |           | 7 | 56.05 | 7933    | 0.36      |
|   |       |         |           | 8 | 57.05 | 37932   | 1.71      |
|   |       |         |           | 9 | 58.05 | 57716   | 2.60      |

Mass chart of compound 6

| #  | m/z    | Abs. In | Rel. Int. | #   | m/z    | Abs. In | Rel. Int. | #   | m/z    | Abs. In | Rel. Int. |
|----|--------|---------|-----------|-----|--------|---------|-----------|-----|--------|---------|-----------|
| 10 | 59.00  | 323380  | 14.56     | 79  | 128.15 | 17920   | 0.81      | 148 | 197.05 | 127657  | 5.75      |
| 11 | 60.00  | 19518   | 0.88      | 80  | 129.15 | 16582   | 0.75      | 149 | 198.00 | 802486  | 36.13     |
| 12 | 61.05  | 25294   | 1.14      | 81  | 130.15 | 23991   | 1.08      | 150 | 198.95 | 111117  | 5.00      |
| 13 | 62.05  | 85663   | 3.86      | 82  | 131.15 | 62358   | 2.81      | 151 | 200.00 | 147049  | 6.62      |
| 14 | 63.05  | 284974  | 12.83     | 83  | 132.10 | 333977  | 15.04     | 152 | 201.00 | 27327   | 1.23      |
| 15 | 64.05  | 250676  | 11.29     | 84  | 133.15 | 66067   | 2.97      | 153 | 202.05 | 6591    | 0.30      |
| 16 | 65.00  | 718538  | 32.35     | 85  | 134.15 | 78340   | 3.53      | 154 | 203.15 | 3651    | 0.16      |
| 17 | 66.00  | 152620  | 6.87      | 86  | 135.15 | 69517   | 3.13      | 155 | 204.15 | 2634    | 0.12      |
| 18 | 66.95  | 28433   | 1.28      | 87  | 136.15 | 11769   | 0.53      | 156 | 205.10 | 8610    | 0.39      |
| 19 | 68.05  | 8877    | 0.40      | 88  | 137.10 | 7681    | 0.35      | 157 | 206.05 | 3512    | 0.16      |
| 20 | 69.05  | 15359   | 0.69      | 89  | 138.15 | 13090   | 0.59      | 158 | 207.05 | 11680   | 0.53      |
| 21 | 70.05  | 8547    | 0.38      | 90  | 139.15 | 52322   | 2.36      | 159 | 208.05 | 15928   | 0.72      |
| 22 | 71.05  | 14796   | 0.67      | 91  | 140.10 | 117575  | 5.29      | 160 | 209.05 | 33769   | 1.52      |
| 23 | 72.05  | 7256    | 0.33      | 92  | 141.05 | 90195   | 4.06      | 161 | 210.05 | 30291   | 1.36      |
| 24 | 73.05  | 29968   | 1.35      | 93  | 142.05 | 52676   | 2.37      | 162 | 211.05 | 55042   | 2.48      |
| 25 | 74.05  | 26922   | 1.21      | 94  | 143.00 | 141599  | 6.38      | 163 | 212.05 | 30408   | 1.37      |
| 26 | 75.05  | 38018   | 1.71      | 95  | 144.00 | 54009   | 2.43      | 164 | 213.05 | 31320   | 1.41      |
| 27 | 76.05  | 89648   | 4.04      | 96  | 145.05 | 43425   | 1.96      | 165 | 214.05 | 18869   | 0.85      |
| 28 | 77.05  | 535908  | 24.13     | 97  | 146.05 | 54032   | 2.43      | 166 | 215.05 | 9367    | 0.42      |
| 29 | 78.05  | 171575  | 7.73      | 98  | 147.10 | 12569   | 0.57      | 167 | 216.05 | 19840   | 0.89      |
| 30 | 79.05  | 144276  | 6.50      | 99  | 148.10 | 17756   | 0.80      | 168 | 217.05 | 4333    | 0.20      |
| 31 | 80.05  | 37639   | 1.69      | 100 | 149.15 | 8208    | 0.37      | 169 | 218.05 | 4479    | 0.20      |
| 32 | 81.05  | 11176   | 0.50      | 101 | 150.15 | 38743   | 1.74      | 170 | 219.10 | 2612    | 0.12      |
| 33 | 82.15  | 5419    | 0.24      | 102 | 151.10 | 102964  | 4.64      | 171 | 220.10 | 778     | 0.04      |
| 34 | 83.10  | 15562   | 0.70      | 103 | 152.05 | 16710   | 0.75      | 172 | 221.15 | 1397    | 0.06      |
| 35 | 84.15  | 7935    | 0.36      | 104 | 153.10 | 11177   | 0.50      | 173 | 222.15 | 1142    | 0.05      |
| 36 | 85.10  | 16374   | 0.74      | 105 | 154.10 | 14711   | 0.66      | 174 | 223.15 | 4881    | 0.22      |
| 37 | 86.15  | 16002   | 0.72      | 106 | 155.05 | 15641   | 0.70      | 175 | 224.05 | 17976   | 0.81      |
| 38 | 87.10  | 69636   | 3.14      | 107 | 156.05 | 11100   | 0.50      | 176 | 225.15 | 20916   | 0.94      |
| 39 | 88.15  | 32733   | 1.47      | 108 | 157.05 | 15214   | 0.69      | 177 | 226.10 | 174902  | 7.87      |
| 40 | 89.15  | 88448   | 3.98      | 109 | 158.05 | 8233    | 0.37      | 178 | 227.15 | 189200  | 8.52      |
| 41 | 90.15  | 210874  | 9.49      | 110 | 159.10 | 16986   | 0.76      | 179 | 228.05 | 447454  | 20.15     |
| 42 | 91.10  | 688561  | 31.00     | 111 | 160.05 | 4503    | 0.20      | 180 | 229.15 | 133404  | 6.01      |
| 43 | 92.15  | 463765  | 20.88     | 112 | 161.15 | 4337    | 0.20      | 181 | 230.05 | 899020  | 40.48     |
| 44 | 93.10  | 862055  | 38.81     | 113 | 162.15 | 5173    | 0.23      | 182 | 231.05 | 114924  | 5.17      |
| 45 | 94.05  | 112139  | 5.05      | 114 | 163.15 | 35647   | 1.60      | 183 | 232.05 | 173318  | 7.80      |
| 46 | 95.00  | 27708   | 1.25      | 115 | 164.10 | 195450  | 8.80      | 184 | 233.05 | 21637   | 0.97      |
| 47 | 96.10  | 5274    | 0.24      | 116 | 165.05 | 50811   | 2.29      | 185 | 234.05 | 3484    | 0.16      |
| 48 | 97.10  | 9146    | 0.41      | 117 | 166.05 | 92270   | 4.15      | 186 | 235.15 | 3179    | 0.14      |
| 49 | 98.15  | 5237    | 0.24      | 118 | 167.05 | 149172  | 6.72      | 187 | 236.15 | 3807    | 0.17      |
| 50 | 99.10  | 12962   | 0.58      | 119 | 168.05 | 172761  | 7.78      | 188 | 237.05 | 8985    | 0.40      |
| 51 | 100.15 | 13487   | 0.61      | 120 | 169.05 | 226041  | 10.18     | 189 | 238.15 | 10887   | 0.49      |
| 52 | 101.10 | 60012   | 2.70      | 121 | 170.00 | 257615  | 11.60     | 190 | 239.10 | 48174   | 2.17      |
| 53 | 102.15 | 30642   | 1.38      | 122 | 171.00 | 96798   | 4.36      | 191 | 240.10 | 75681   | 3.41      |
| 54 | 103.15 | 88585   | 3.99      | 123 | 172.00 | 69998   | 3.15      | 192 | 241.10 | 157647  | 7.10      |
| 55 | 104.10 | 204116  | 9.19      | 124 | 173.00 | 21033   | 0.95      | 193 | 242.15 | 186228  | 8.38      |
| 56 | 105.15 | 159966  | 7.20      | 125 | 174.10 | 7897    | 0.36      | 194 | 243.10 | 230793  | 10.39     |
| 57 | 106.10 | 568420  | 25.59     | 126 | 175.15 | 17735   | 0.80      | 195 | 244.05 | 179124  | 8.07      |
| 58 | 107.10 | 76871   | 3.46      | 127 | 176.15 | 7737    | 0.35      | 196 | 245.05 | 65413   | 2.95      |
| 59 | 108.05 | 12580   | 0.57      | 128 | 177.15 | 62536   | 2.82      | 197 | 246.05 | 36727   | 1.65      |
| 60 | 109.10 | 3719    | 0.17      | 129 | 178.10 | 605762  | 27.27     | 198 | 247.20 | 22822   | 1.03      |
| 61 | 110.15 | 3039    | 0.14      | 130 | 179.05 | 72024   | 3.24      | 199 | 248.15 | 7827    | 0.35      |
| 62 | 111.15 | 9856    | 0.44      | 131 | 180.05 | 20815   | 0.94      | 200 | 249.15 | 2124    | 0.10      |
| 63 | 112.15 | 15347   | 0.69      | 132 | 181.10 | 26969   | 1.21      | 201 | 250.25 | 1835    | 0.08      |
| 64 | 113.10 | 93678   | 4.22      | 133 | 182.05 | 36544   | 1.65      | 202 | 251.20 | 7351    | 0.33      |
| 65 | 114.15 | 34219   | 1.54      | 134 | 183.10 | 28086   | 1.26      | 203 | 252.15 | 3123    | 0.14      |
| 66 | 115.10 | 49390   | 2.22      | 135 | 184.05 | 26423   | 1.19      | 204 | 253.15 | 6626    | 0.30      |
| 67 | 116.15 | 38664   | 1.74      | 136 | 185.00 | 19938   | 0.90      | 205 | 254.15 | 7024    | 0.32      |
| 68 | 117.10 | 130407  | 5.87      | 137 | 186.00 | 10751   | 0.48      | 206 | 255.10 | 19212   | 0.87      |
| 69 | 118.15 | 63644   | 2.87      | 138 | 187.05 | 6516    | 0.29      | 207 | 256.15 | 19273   | 0.87      |
| 70 | 119.10 | 142945  | 6.44      | 139 | 188.25 | 4750    | 0.21      | 208 | 257.10 | 29007   | 1.31      |
| 71 | 120.10 | 98100   | 4.42      | 140 | 189.15 | 25047   | 1.13      | 209 | 258.15 | 10175   | 0.46      |
| 72 | 121.05 | 14291   | 0.64      | 141 | 190.15 | 9994    | 0.45      | 210 | 259.20 | 21718   | 0.98      |
| 73 | 122.10 | 5969    | 0.27      | 142 | 191.15 | 57570   | 2.59      | 211 | 260.15 | 6061    | 0.27      |
| 74 | 123.05 | 3081    | 0.14      | 143 | 192.10 | 82754   | 3.73      | 212 | 261.15 | 4356    | 0.20      |
| 75 | 124.15 | 1538    | 0.07      | 144 | 193.05 | 33585   | 1.51      | 213 | 262.15 | 3391    | 0.15      |
| 76 | 125.15 | 3955    | 0.18      | 145 | 194.05 | 172249  | 7.76      | 214 | 263.15 | 3353    | 0.15      |
| 77 | 126.15 | 7068    | 0.32      | 146 | 195.05 | 249002  | 11.21     | 215 | 264.10 | 1687    | 0.08      |
| 78 | 127.15 | 19469   | 0.88      | 147 | 196.00 | 413670  | 18.63     | 216 | 265.15 | 3515    | 0.16      |

Mass chart of compound 6

| #   | m/z    | Abs. In | Rel. Int. | #   | m/z    | Abs. In | Rel. Int. | #   | m/z    | Abs. In | Rel. Int. |
|-----|--------|---------|-----------|-----|--------|---------|-----------|-----|--------|---------|-----------|
| 217 | 266.15 | 2637    | 0.12      | 277 | 326.15 | 836     | 0.04      | 337 | 387.30 | 279     | 0.01      |
| 218 | 267.10 | 18146   | 0.82      | 278 | 327.15 | 2834    | 0.13      | 338 | 388.25 | 396     | 0.02      |
| 219 | 268.15 | 20158   | 0.91      | 279 | 328.15 | 6050    | 0.27      | 339 | 389.35 | 651     | 0.03      |
| 220 | 269.10 | 46786   | 2.11      | 280 | 329.15 | 23275   | 1.05      | 340 | 390.25 | 1290    | 0.06      |
| 221 | 270.15 | 15694   | 0.71      | 281 | 330.15 | 29151   | 1.31      | 341 | 391.35 | 1022    | 0.05      |
| 222 | 271.10 | 96137   | 4.33      | 282 | 331.15 | 50733   | 2.28      | 342 | 392.30 | 1966    | 0.09      |
| 223 | 272.05 | 16070   | 0.72      | 283 | 332.15 | 33893   | 1.53      | 343 | 393.35 | 1297    | 0.06      |
| 224 | 273.10 | 21305   | 0.96      | 284 | 333.15 | 88344   | 3.98      | 344 | 394.30 | 940     | 0.04      |
| 225 | 274.05 | 3890    | 0.18      | 285 | 334.05 | 24078   | 1.08      | 345 | 395.30 | 473     | 0.02      |
| 226 | 275.15 | 1899    | 0.09      | 286 | 335.15 | 19856   | 0.89      | 346 | 396.45 | 384     | 0.02      |
| 227 | 276.25 | 1345    | 0.06      | 287 | 336.15 | 4538    | 0.20      | 347 | 397.50 | 1070    | 0.05      |
| 228 | 277.20 | 2796    | 0.13      | 288 | 337.15 | 1006    | 0.05      | 348 | 398.45 | 585     | 0.03      |
| 229 | 278.15 | 1435    | 0.06      | 289 | 338.25 | 662     | 0.03      | 349 | 399.45 | 317     | 0.01      |
| 230 | 279.15 | 898     | 0.04      | 290 | 339.30 | 1508    | 0.07      | 350 | 400.20 | 370     | 0.02      |
| 231 | 280.15 | 727     | 0.03      | 291 | 340.25 | 578     | 0.03      | 351 | 401.20 | 289     | 0.01      |
| 232 | 281.15 | 2478    | 0.11      | 292 | 341.25 | 684     | 0.03      | 352 | 402.20 | 250     | 0.01      |
| 233 | 282.15 | 2409    | 0.11      | 293 | 342.25 | 584     | 0.03      | 353 | 403.20 | 257     | 0.01      |
| 234 | 283.10 | 5790    | 0.26      | 294 | 343.25 | 805     | 0.04      | 354 | 404.45 | 336     | 0.02      |
| 235 | 284.15 | 3531    | 0.16      | 295 | 344.20 | 1958    | 0.09      | 355 | 405.40 | 1146    | 0.05      |
| 236 | 285.10 | 12303   | 0.55      | 296 | 345.25 | 2706    | 0.12      | 356 | 406.35 | 447     | 0.02      |
| 237 | 286.15 | 5148    | 0.23      | 297 | 346.20 | 3890    | 0.18      | 357 | 407.40 | 271     | 0.01      |
| 238 | 287.10 | 5833    | 0.26      | 298 | 347.25 | 4640    | 0.21      | 358 | 409.45 | 410     | 0.02      |
| 239 | 288.25 | 2633    | 0.12      | 299 | 348.20 | 7434    | 0.33      | 359 | 410.50 | 282     | 0.01      |
| 240 | 289.15 | 7201    | 0.32      | 300 | 349.15 | 2578    | 0.12      | 360 | 411.50 | 583     | 0.03      |
| 241 | 290.15 | 2596    | 0.12      | 301 | 350.15 | 2611    | 0.12      | 361 | 412.50 | 284     | 0.01      |
| 242 | 291.20 | 2186    | 0.10      | 302 | 351.20 | 977     | 0.04      | 362 | 415.50 | 254     | 0.01      |
| 243 | 292.15 | 1131    | 0.05      | 303 | 352.15 | 764     | 0.03      | 363 | 417.50 | 207     | 0.01      |
| 244 | 293.25 | 1594    | 0.07      | 304 | 353.25 | 847     | 0.04      | 364 | 418.50 | 257     | 0.01      |
| 245 | 294.25 | 1118    | 0.05      | 305 | 354.15 | 553     | 0.02      | 365 | 419.50 | 354     | 0.02      |
| 246 | 295.20 | 5345    | 0.24      | 306 | 355.25 | 657     | 0.03      | 366 | 421.50 | 326     | 0.01      |
| 247 | 296.15 | 1761    | 0.08      | 307 | 356.25 | 704     | 0.03      | 367 | 423.50 | 396     | 0.02      |
| 248 | 297.25 | 811     | 0.04      | 308 | 357.25 | 3443    | 0.16      | 368 | 425.50 | 250     | 0.01      |
| 249 | 298.35 | 617     | 0.03      | 309 | 358.20 | 42783   | 1.93      | 369 | 426.50 | 212     | 0.01      |
| 250 | 299.30 | 823     | 0.04      | 310 | 359.25 | 41697   | 1.88      | 370 | 428.35 | 430     | 0.02      |
| 251 | 300.25 | 1273    | 0.06      | 311 | 360.20 | 448631  | 20.20     | 371 | 429.30 | 458     | 0.02      |
| 252 | 301.25 | 1429    | 0.06      | 312 | 361.25 | 490508  | 22.09     | 372 | 430.30 | 231     | 0.01      |
| 253 | 302.25 | 2061    | 0.09      | 313 | 362.20 | 113024  | 50.89     | 373 | 432.30 | 222     | 0.01      |
| 254 | 303.30 | 3346    | 0.15      | 314 | 363.25 | 433043  | 19.50     | 374 | 433.30 | 212     | 0.01      |
| 255 | 304.35 | 3895    | 0.18      | 315 | 364.20 | 222099  | 100.00    | 375 | 434.30 | 201     | 0.01      |
| 256 | 305.30 | 14001   | 0.63      | 316 | 365.15 | 516139  | 23.24     | 376 | 436.40 | 250     | 0.01      |
| 257 | 306.20 | 5601    | 0.25      | 317 | 366.15 | 453240  | 20.41     | 377 | 437.45 | 688     | 0.03      |
| 258 | 307.15 | 2298    | 0.10      | 318 | 367.15 | 94607   | 4.26      | 378 | 438.35 | 497     | 0.02      |
| 259 | 308.15 | 902     | 0.04      | 319 | 368.15 | 13453   | 0.61      | 379 | 439.50 | 431     | 0.02      |
| 260 | 309.30 | 892     | 0.04      | 320 | 369.15 | 2332    | 0.10      | 380 | 441.50 | 303     | 0.01      |
| 261 | 310.25 | 583     | 0.03      | 321 | 370.30 | 4468    | 0.20      | 381 | 442.50 | 233     | 0.01      |
| 262 | 311.35 | 721     | 0.03      | 322 | 371.25 | 1831    | 0.08      | 382 | 444.50 | 210     | 0.01      |
| 263 | 312.35 | 712     | 0.03      | 323 | 372.20 | 5146    | 0.23      | 383 | 451.50 | 289     | 0.01      |
| 264 | 313.35 | 1160    | 0.05      | 324 | 373.25 | 5093    | 0.23      | 384 | 452.50 | 233     | 0.01      |
| 265 | 314.35 | 803     | 0.04      | 325 | 374.25 | 54806   | 2.47      | 385 | 454.45 | 304     | 0.01      |
| 266 | 315.35 | 918     | 0.04      | 326 | 375.25 | 61887   | 2.79      | 386 | 455.40 | 1105    | 0.05      |
| 267 | 316.35 | 904     | 0.04      | 327 | 376.20 | 144442  | 6.50      | 387 | 456.35 | 499     | 0.02      |
| 268 | 317.30 | 4386    | 0.20      | 328 | 377.25 | 48025   | 2.16      | 388 | 457.10 | 265     | 0.01      |
| 269 | 318.25 | 2391    | 0.11      | 329 | 378.20 | 271025  | 12.20     | 389 | 458.15 | 443     | 0.02      |
| 270 | 319.25 | 2801    | 0.13      | 330 | 379.15 | 67760   | 3.05      | 390 | 459.10 | 218     | 0.01      |
| 271 | 320.25 | 1770    | 0.08      | 331 | 380.20 | 56982   | 2.57      | 391 | 460.20 | 433     | 0.02      |
| 272 | 321.20 | 4260    | 0.19      | 332 | 381.15 | 13270   | 0.60      | 392 | 462.20 | 287     | 0.01      |
| 273 | 322.25 | 2058    | 0.09      | 333 | 382.15 | 2182    | 0.10      | 393 | 463.40 | 473     | 0.02      |
| 274 | 323.25 | 2501    | 0.11      | 334 | 383.20 | 484     | 0.02      | 394 | 464.40 | 252     | 0.01      |
| 275 | 324.25 | 848     | 0.04      | 335 | 384.20 | 236     | 0.01      | 395 | 466.40 | 212     | 0.01      |
| 276 | 325.15 | 508     | 0.02      | 336 | 386.20 | 215     | 0.01      |     |        |         |           |



4-((2-(methoxycarbonyl)-4-(methylselanyl)phenyl)amino)-4-oxobut-2-enoic acid (7)

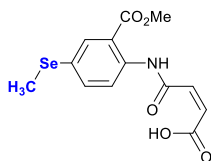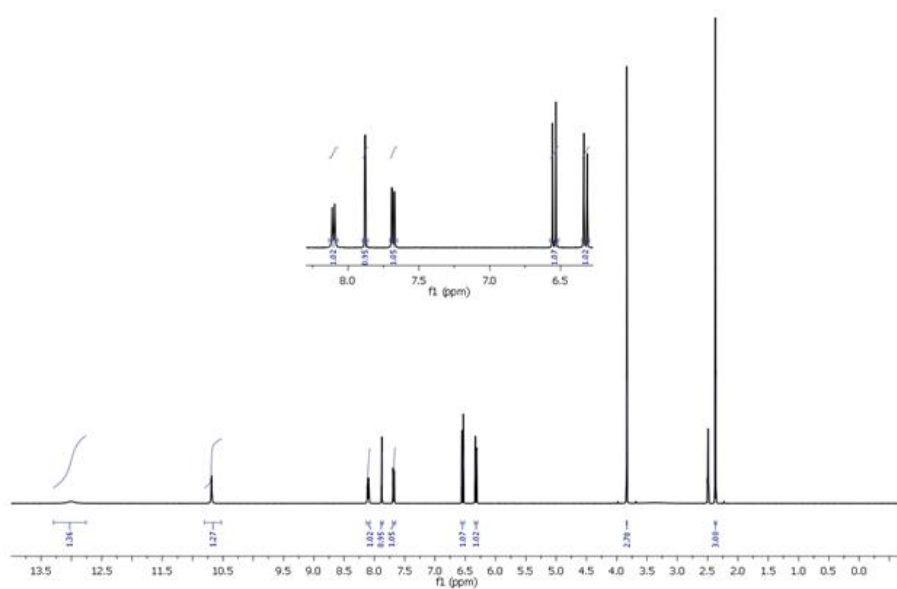

<sup>1</sup>H NMR chart of compound 7

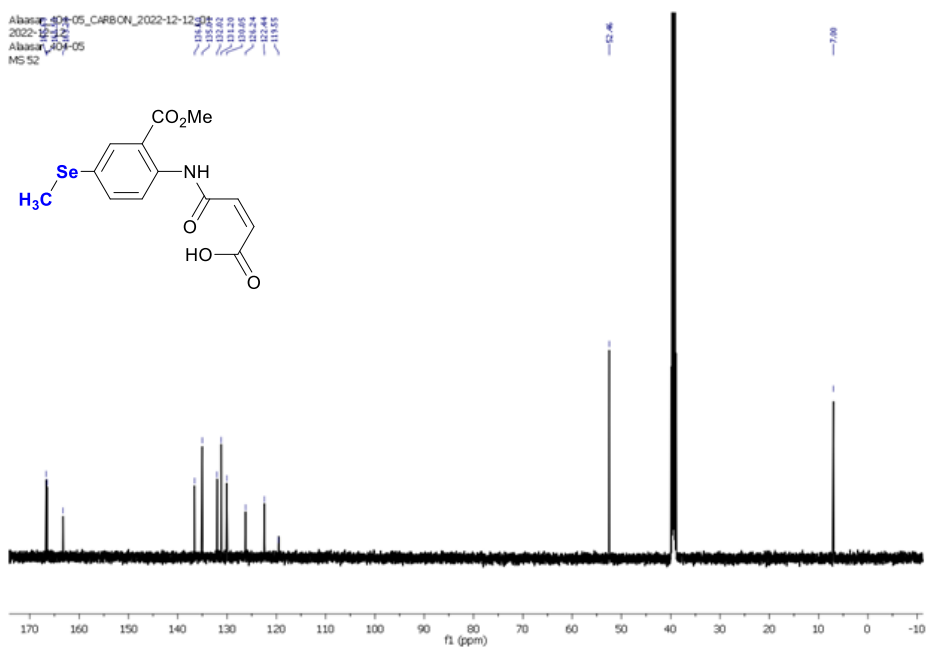

<sup>13</sup>C NMR chart of compound 7

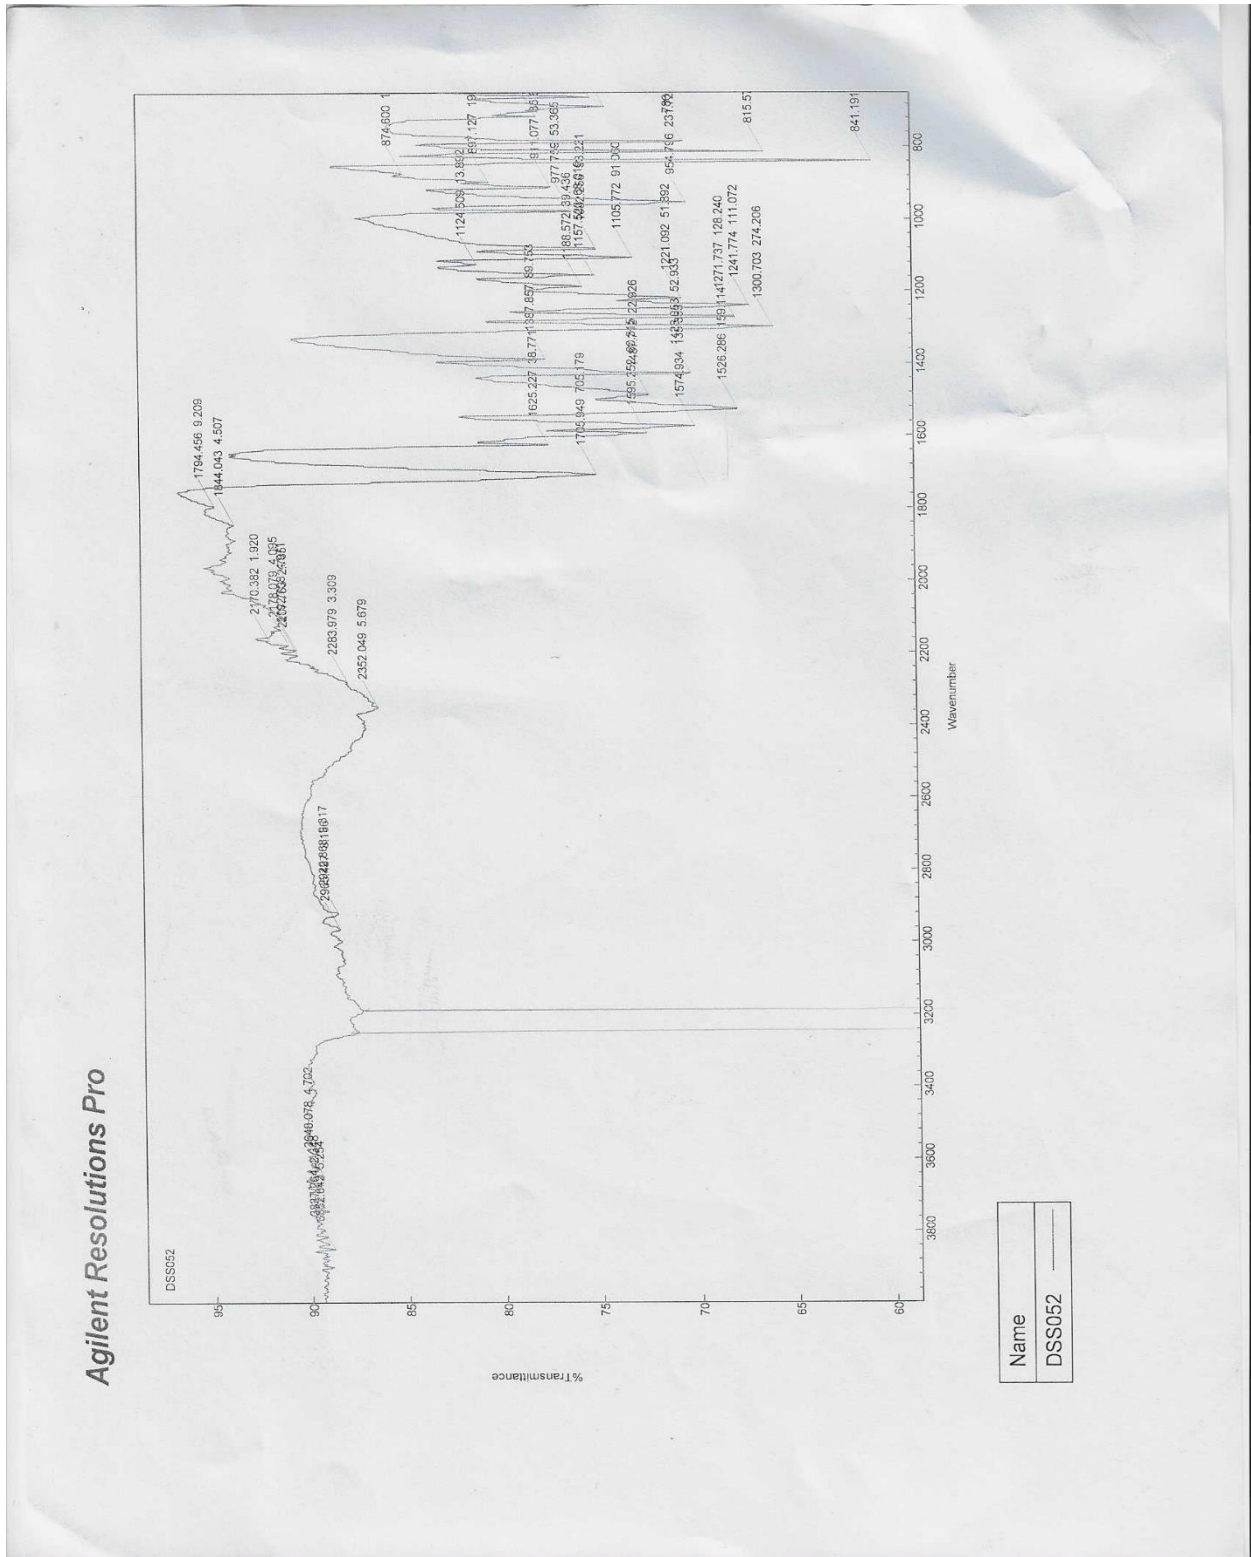

IR chart of compound 7

Spectrum RT 0:59 - 1:38 (11 scans) - Background Subtracted 0 - 1:03  
Alaasar\_DS052-1\_Scan1\_is1.datx 2023.03.01 14:04:01 ;  
ESI + Max: 2.7E6

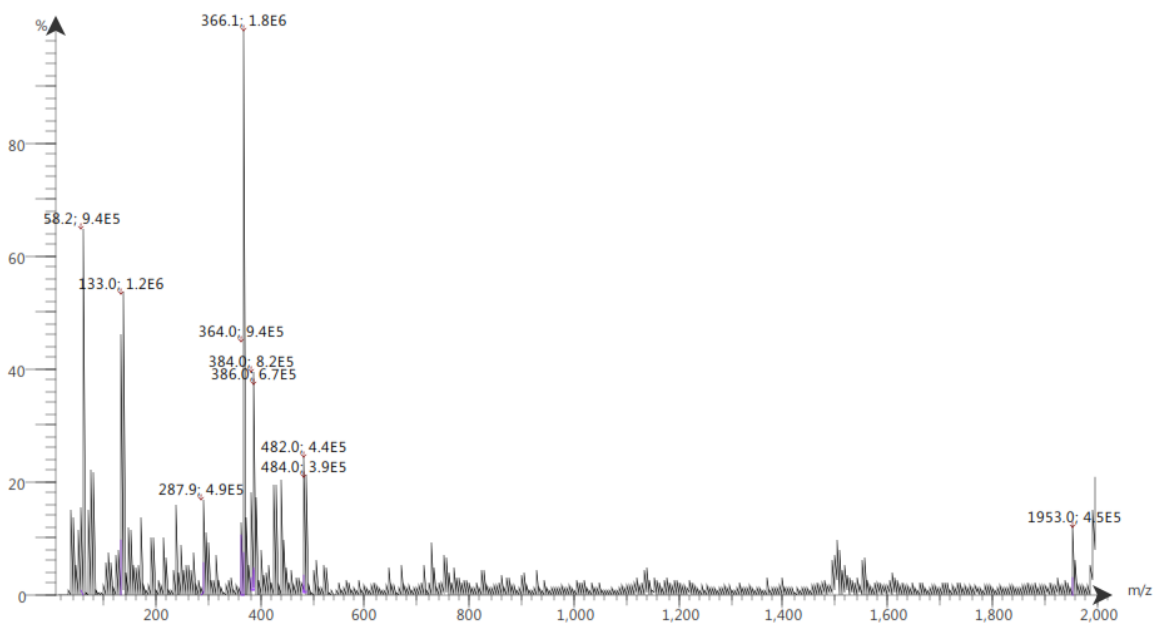

MS chart of compound 7

Spectrum RT 0:54 - 1:23 (65 scans) - Background Subtracted 0 - 0:50  
Alaasar\_DS052-2\_Scan1\_is1.datx 2023.03.01 14:09:33 ;  
ESI + Max: 2.7E6

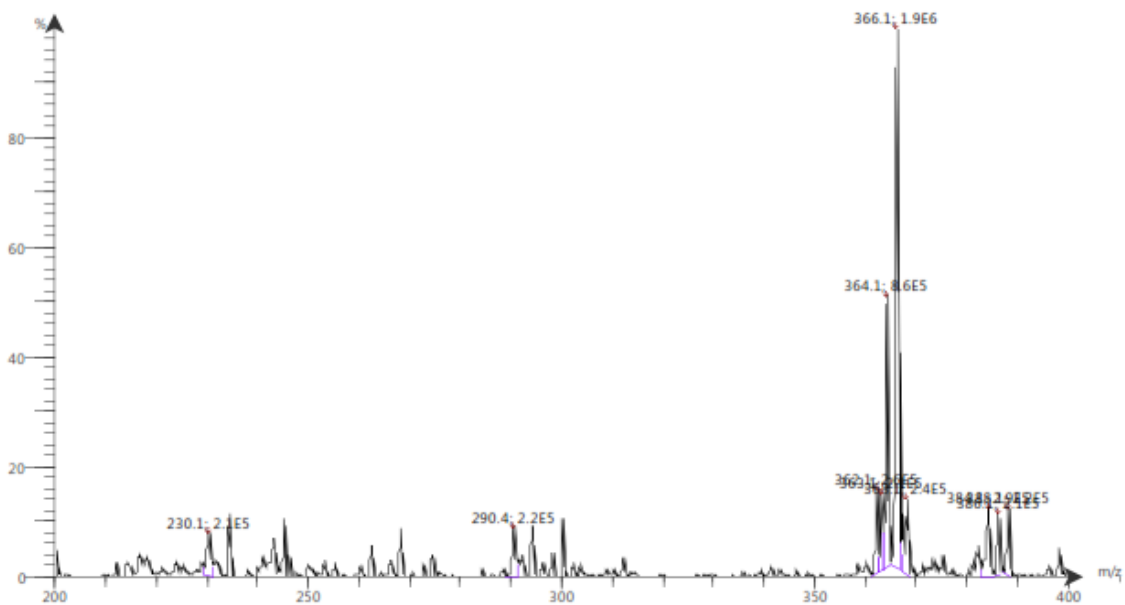

MS chart of compound 7

**4-((2-(methoxycarbonyl)-4-(methylselanyl)phenyl)amino)-4-oxobut-2-enoic acid (8)**

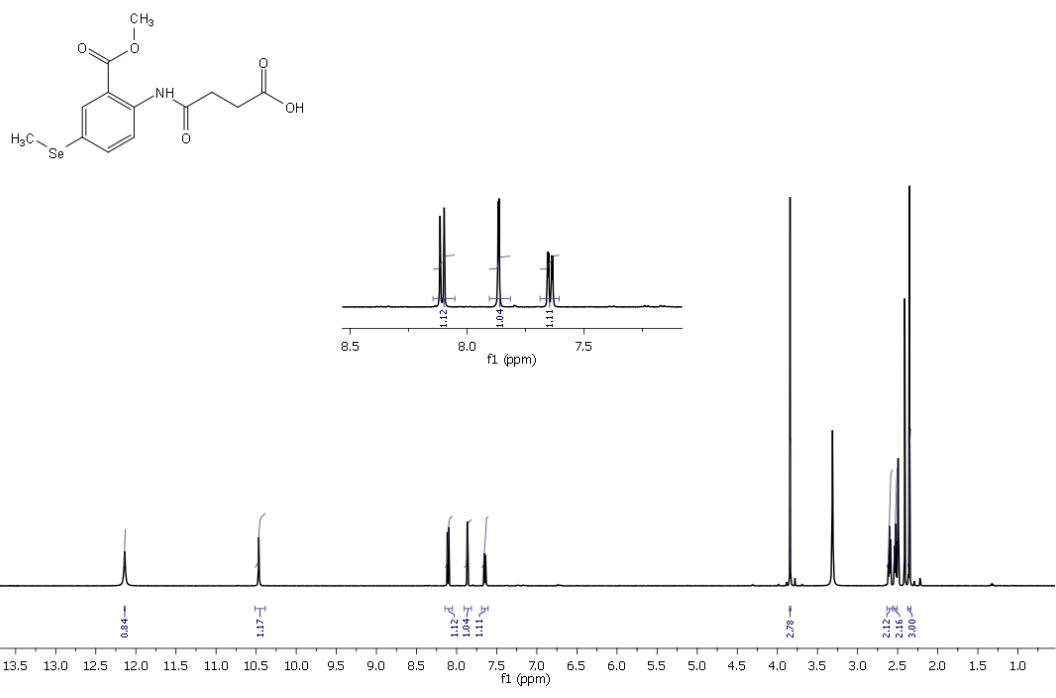

**<sup>1</sup>H NMR chart of compound 8**

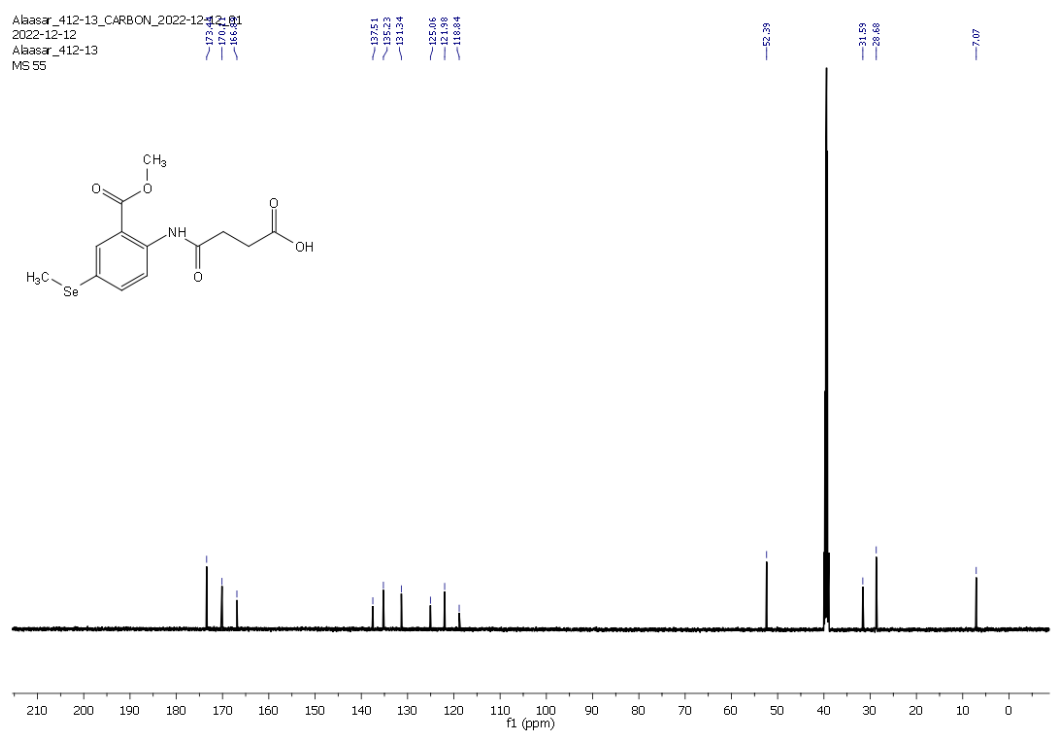

**<sup>13</sup>C NMR chart of compound 8**



Spectrum RT 0:55 - 1:34 (11 scans) - Background Subtracted 0 - 0:51  
Alaasar\_DS055-1\_Scan1\_is1.datx 2023.03.01 14:15:52 ;  
ESI + Max: 7.1E6

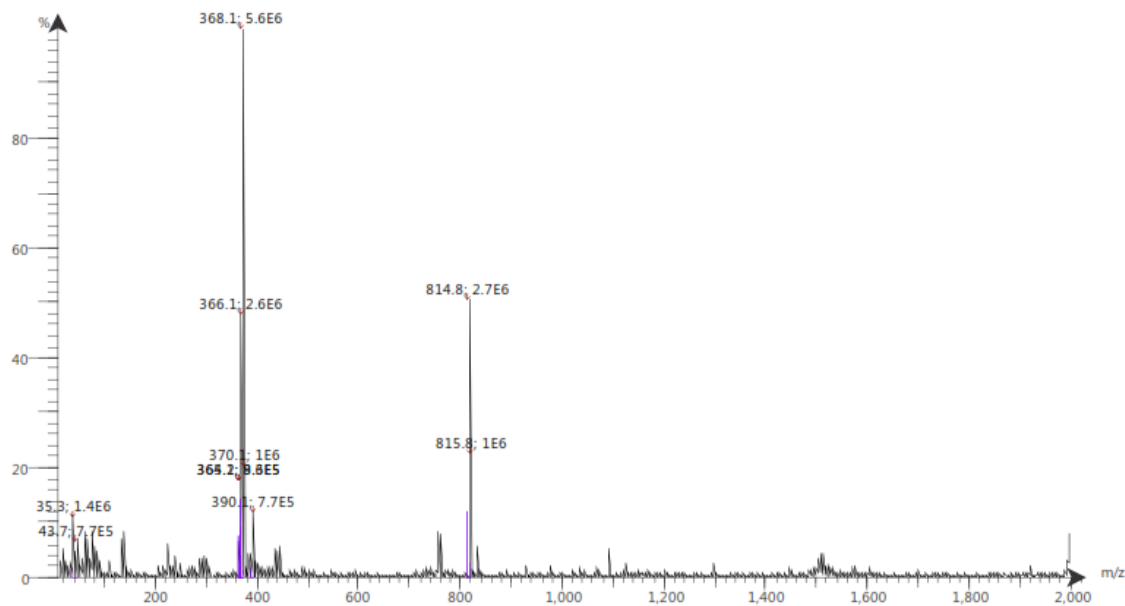

MS chart of compound 8

Spectrum RT 1:11 - 1:52 (91 scans) - Background Subtracted 0 - 1:07  
Alaasar\_DS055-2\_Scan1\_is1.datx 2023.03.01 14:20:53 ;  
ESI + Max: 1E7

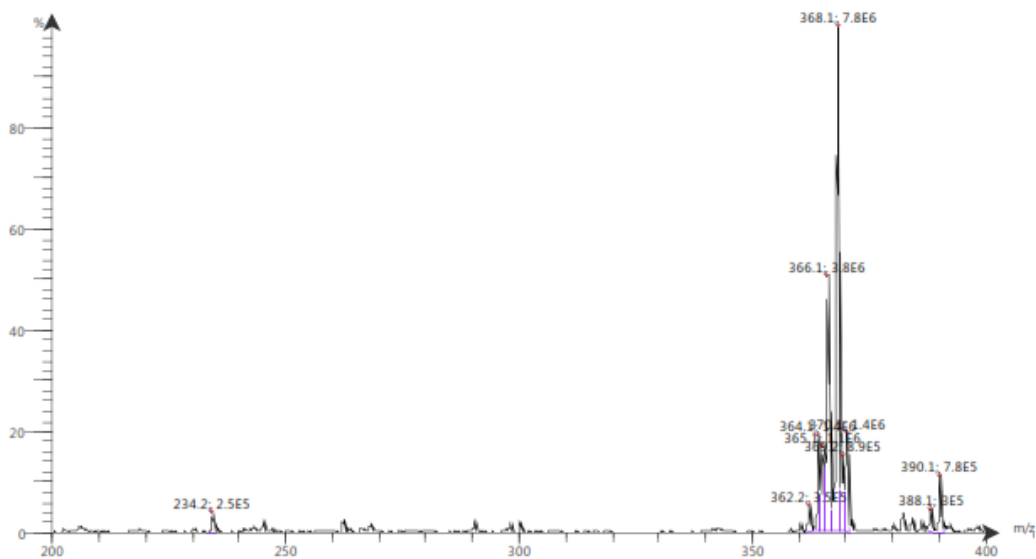

MS chart of compound 8

**4-((2-(methoxycarbonyl)-4-(methylselanyl)phenyl)amino)-4-oxobut-2-enoic acid (9)**

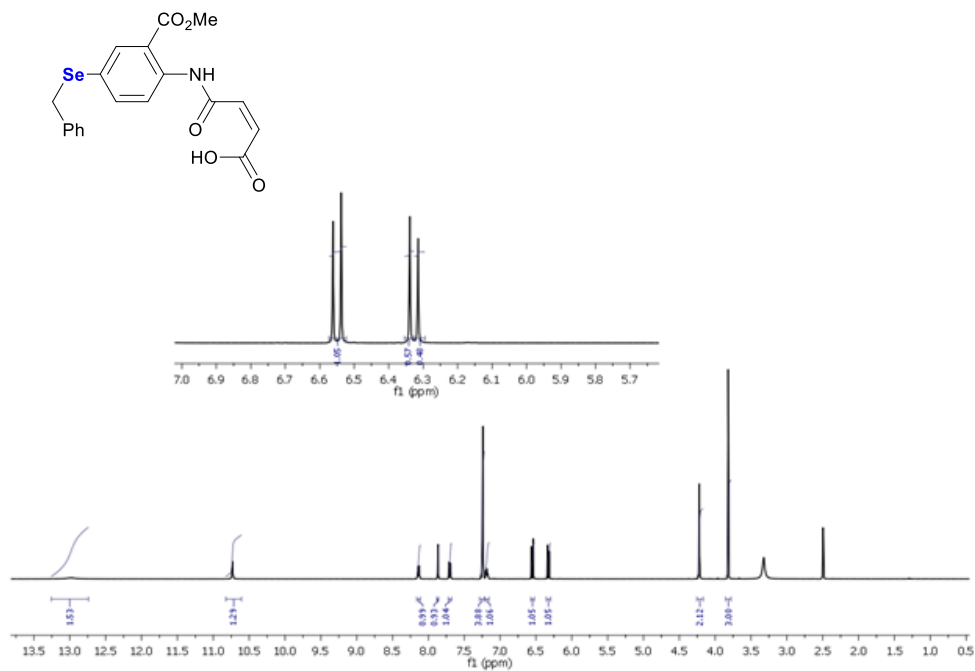

**<sup>1</sup>H NMR chart of compound 9**

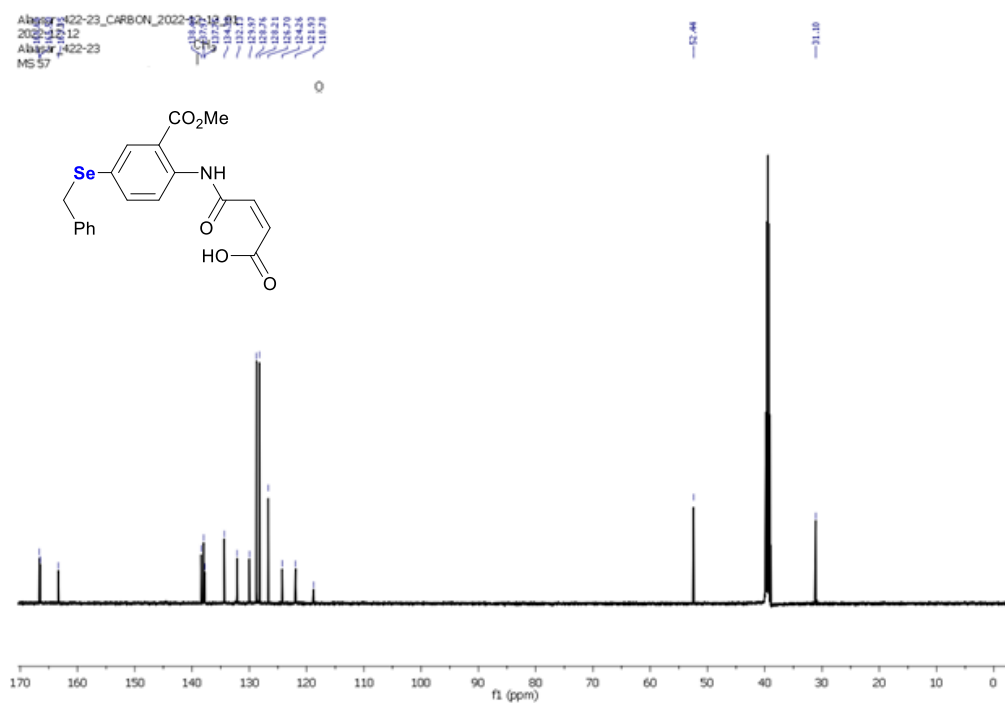

**<sup>13</sup>C NMR chart of compound 9**

Agilent Resolutions Pro

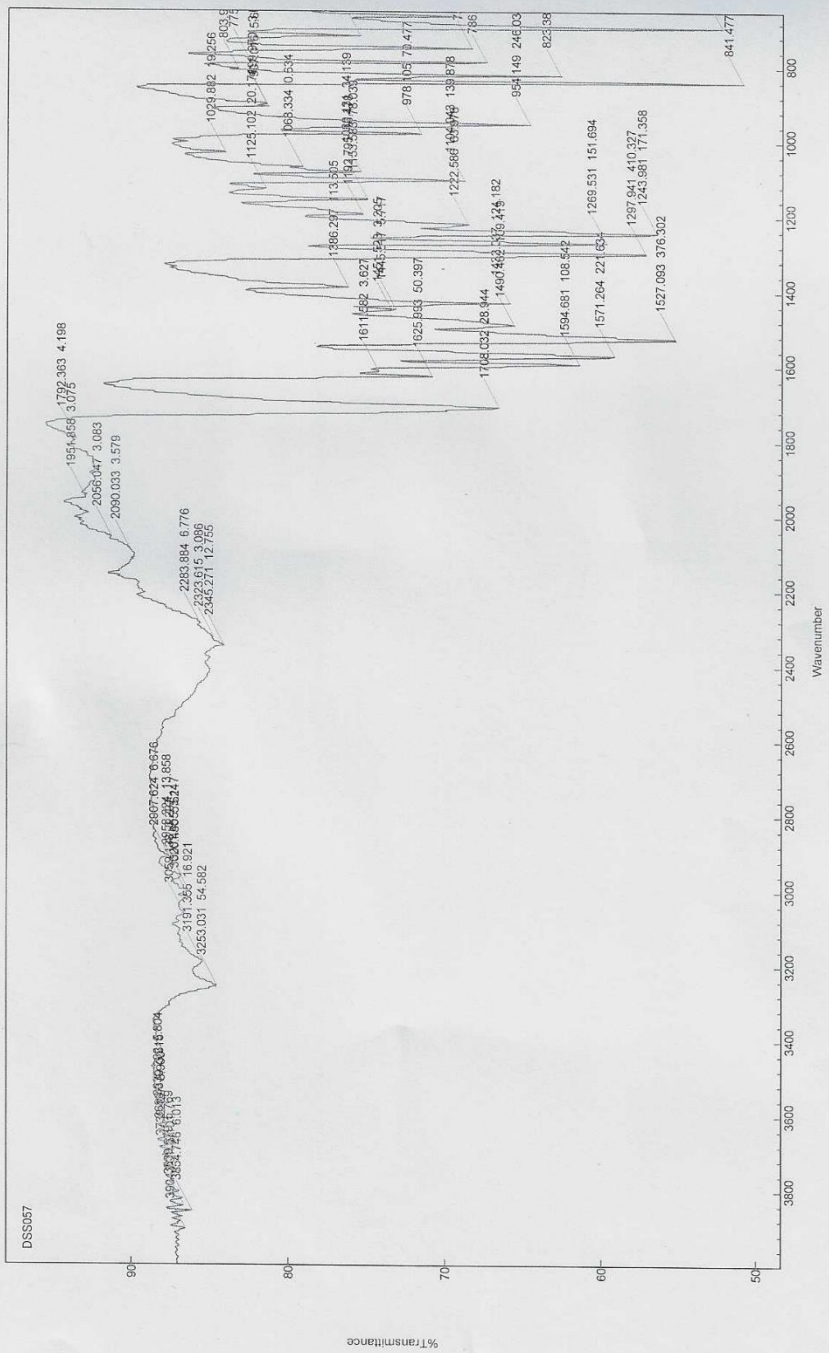

|        |
|--------|
| Name   |
| DSS057 |

IR chart of compound 9



Spectrum RT 0:51 - 1:34 (12 scans) - Background Subtracted 0 - 0:51  
Alaasar\_DS057-1\_Scan1\_is1.datx 2023.03.01 14:29:02 ;  
ESI + Max: 8.7E6

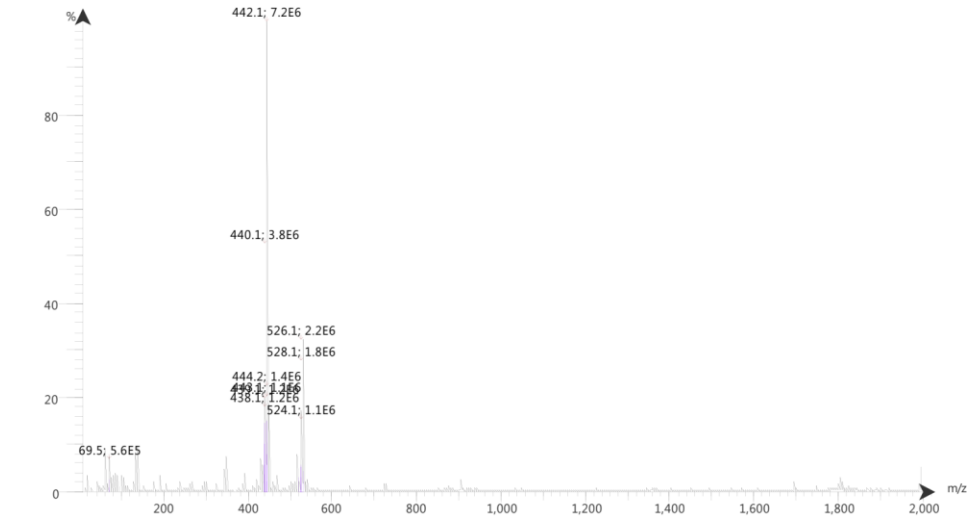

MS chart of compound 9

Spectrum RT 0:54 - 1:27 (74 scans) - Background Subtracted 1 - 0:53  
Alaasar\_DS057-2\_Scan1\_is1.datx 2023.03.01 14:33:46 ;  
ESI + Max: 1.3E7

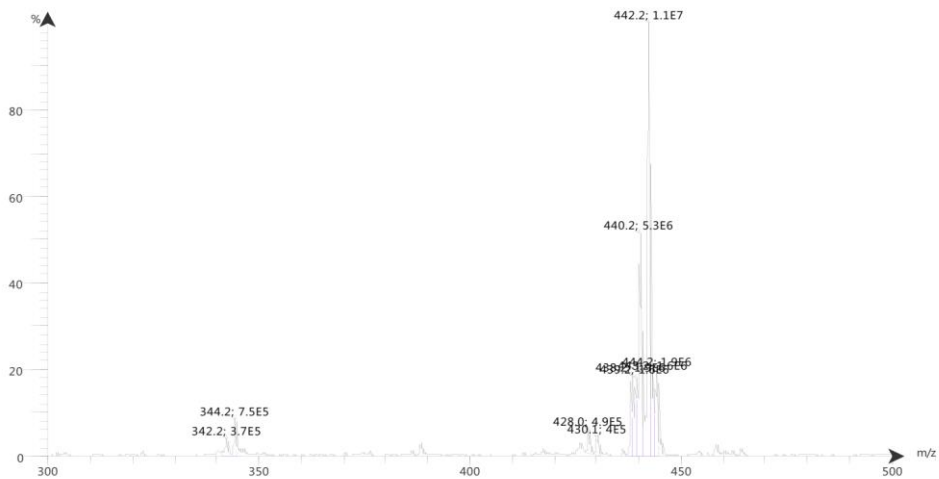

MS chart of compound 9

**4-((2-(methoxycarbonyl)-4-(methylselanyl)phenyl)amino)-4-oxobut-2-enoic acid (10)**

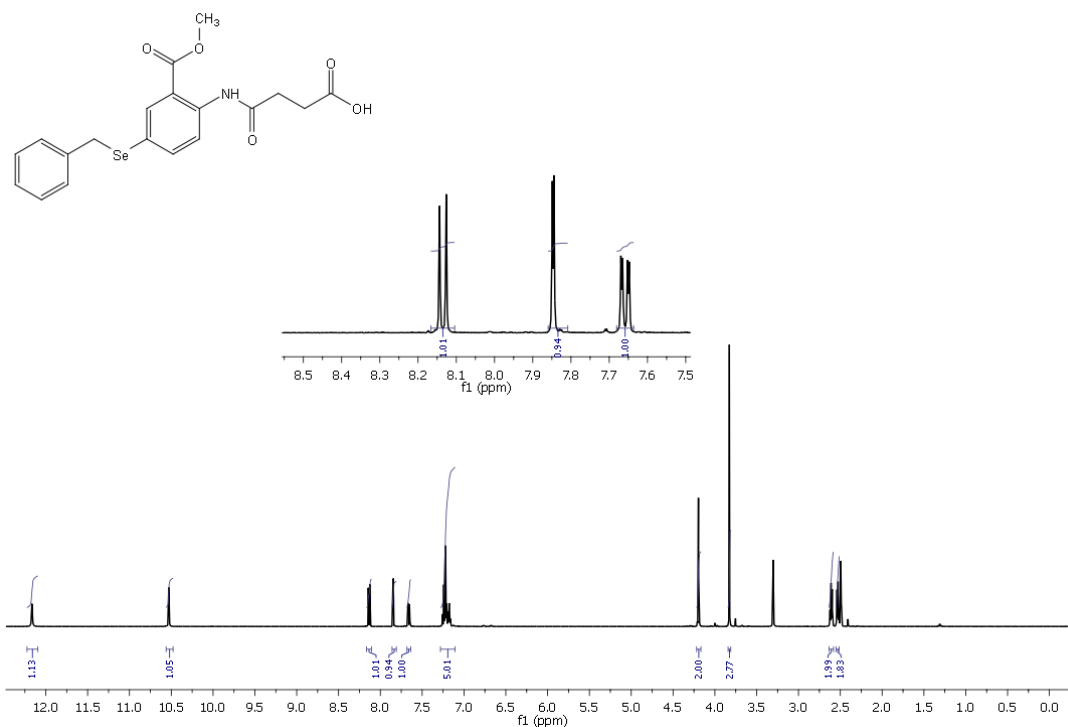

**<sup>1</sup>H NMR chart of compound 10**

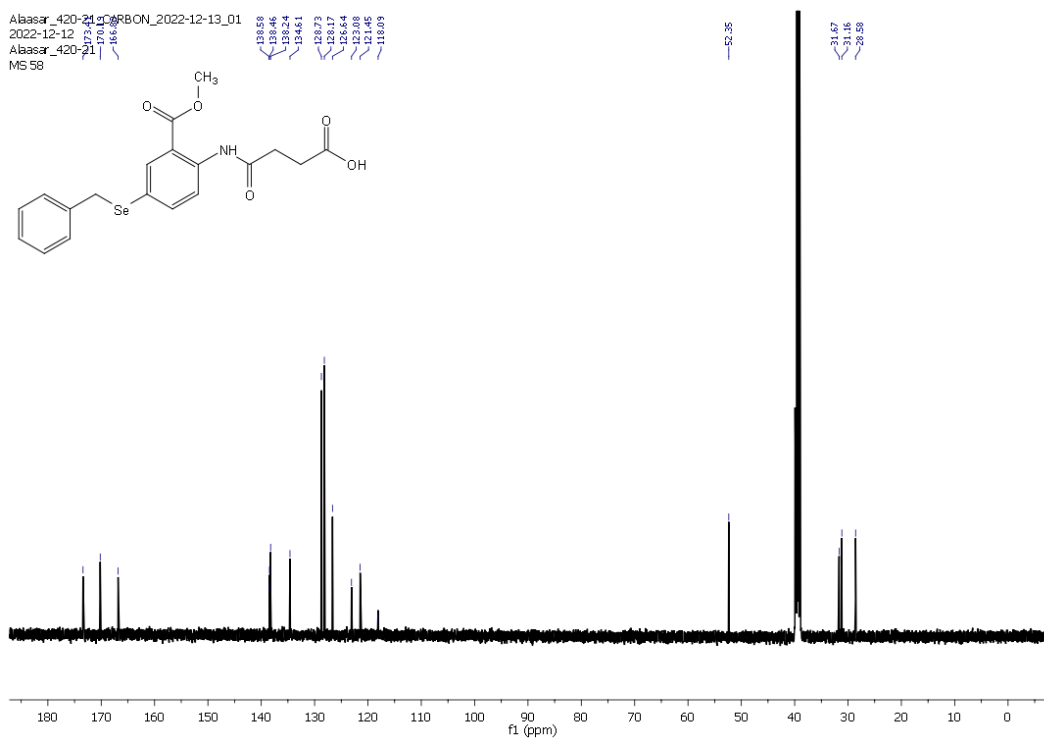

**<sup>13</sup>C NMR chart of compound 10**

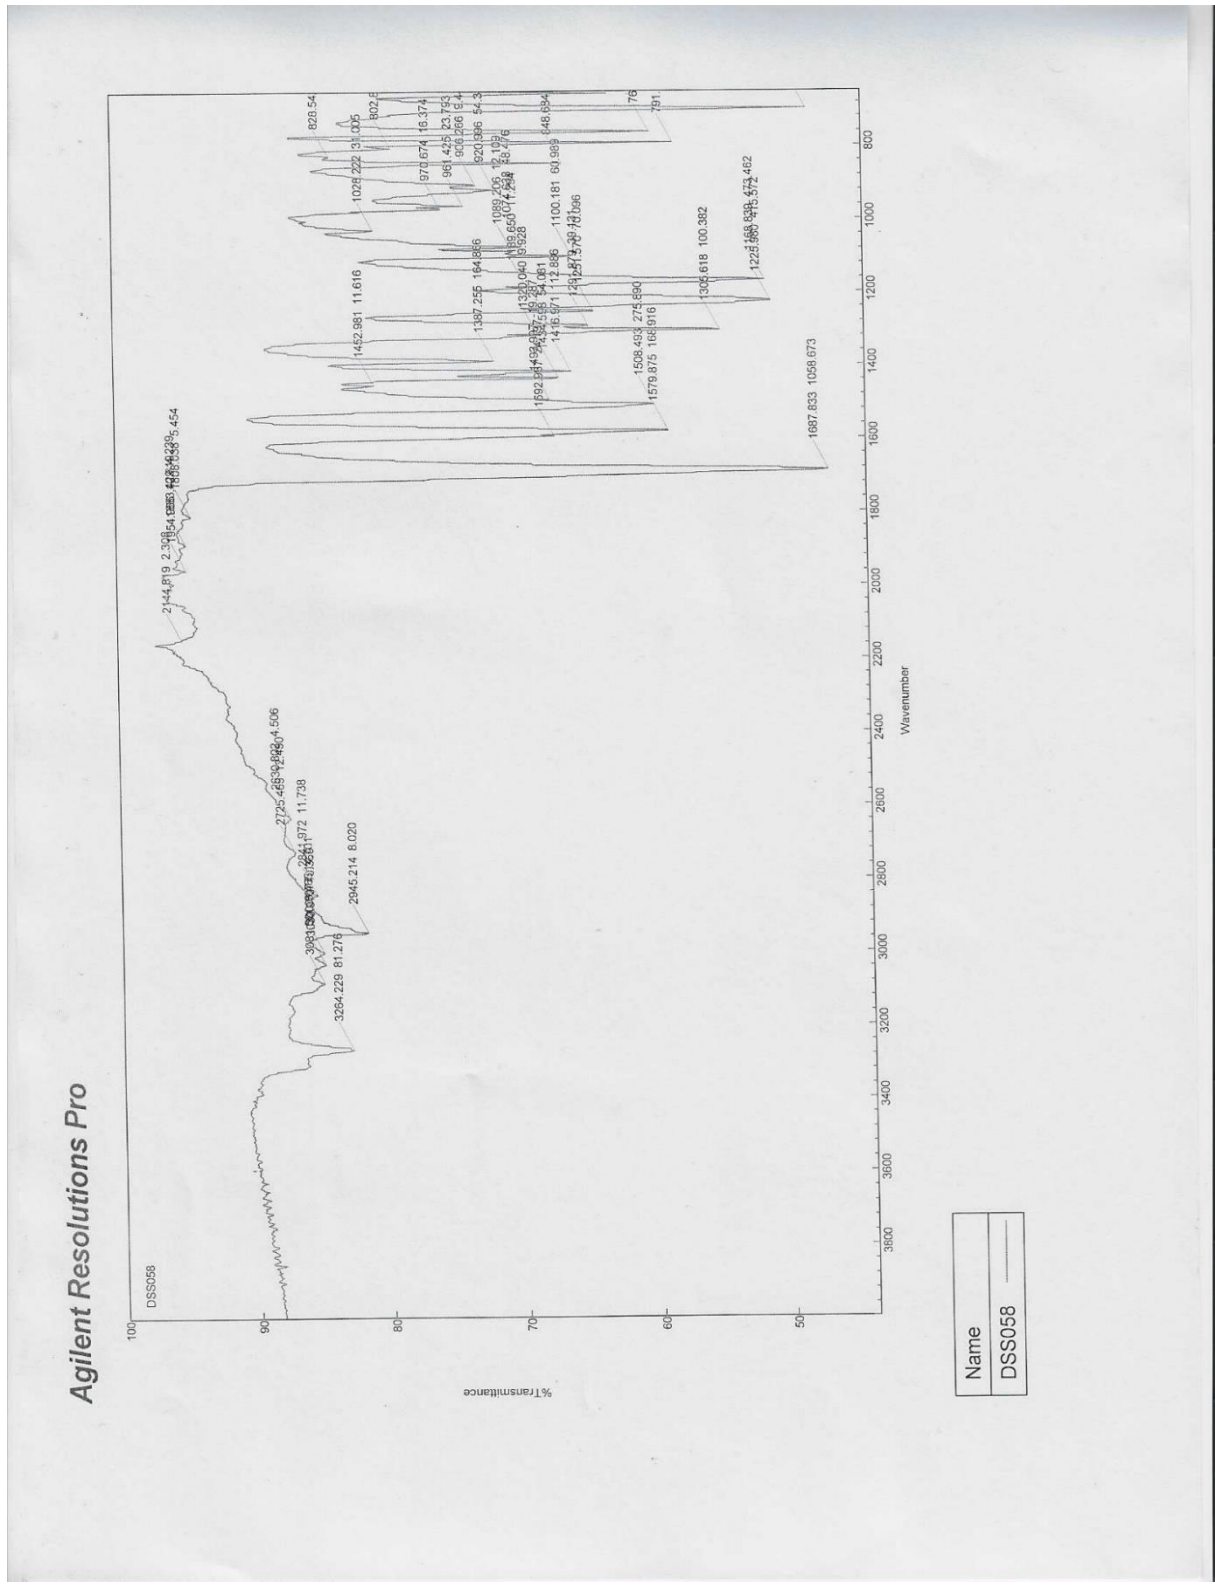

IR chart of compound 10

Spectrum RT 0:56 - 1:26 (68 scans) - Background Subtracted 0 - 0:52  
Alaasar\_DS058-2\_Scan2\_is2.datx 2023.03.01 14:48:35 ;  
ESI - Max: 2.5E7

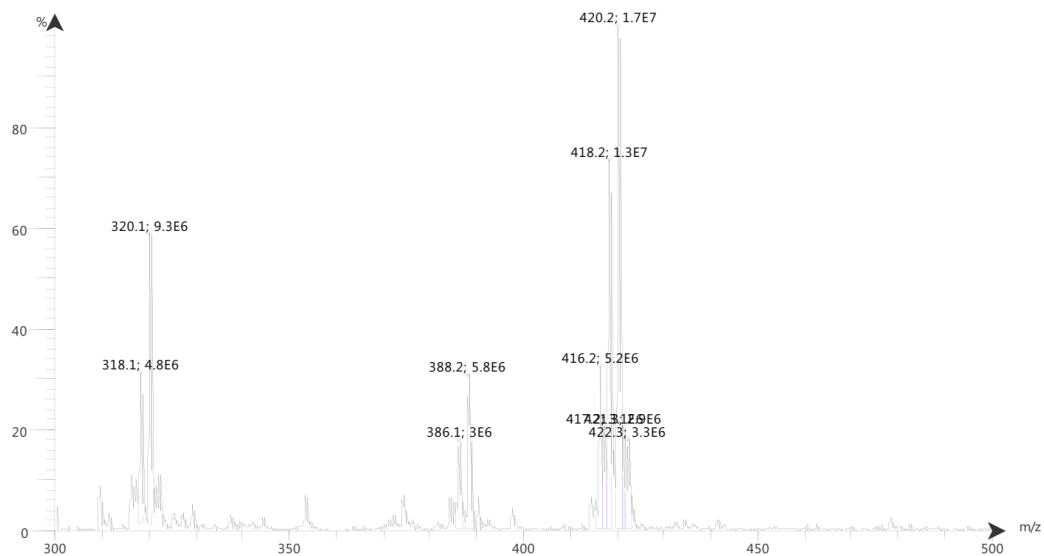

MS chart of compound 10

Spectrum RT 0:55 - 1:29 (75 scans) - Background Subtracted 0 - 0:54  
Alaasar\_DS058-2\_Scan1\_is1.datx 2023.03.01 14:48:34 ;  
ESI + Max: 1E7

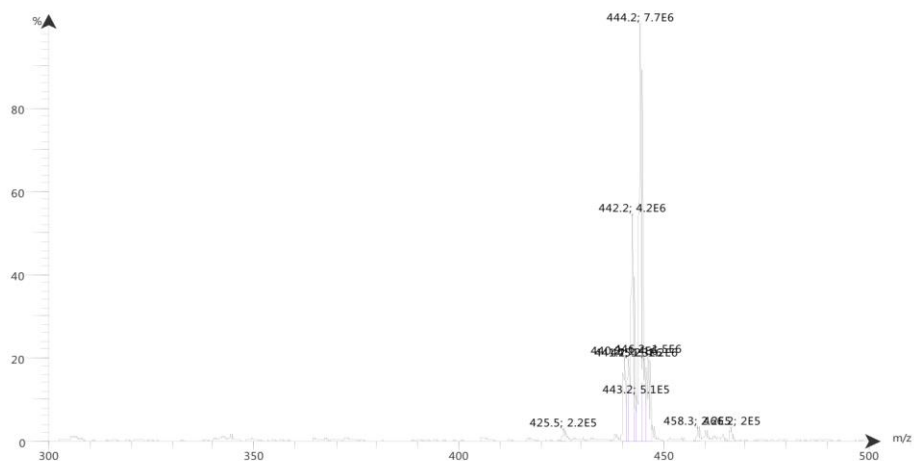

MS chart of compound 10

Spectrum RT 0:59 - 1:53 (15 scans) - Background Subtracted 0 - 0:59  
Alaasar\_DS058-1\_Scan1\_is1.datx 2023.03.01 14:40:39 ;  
ESI + Max: 6.7E6

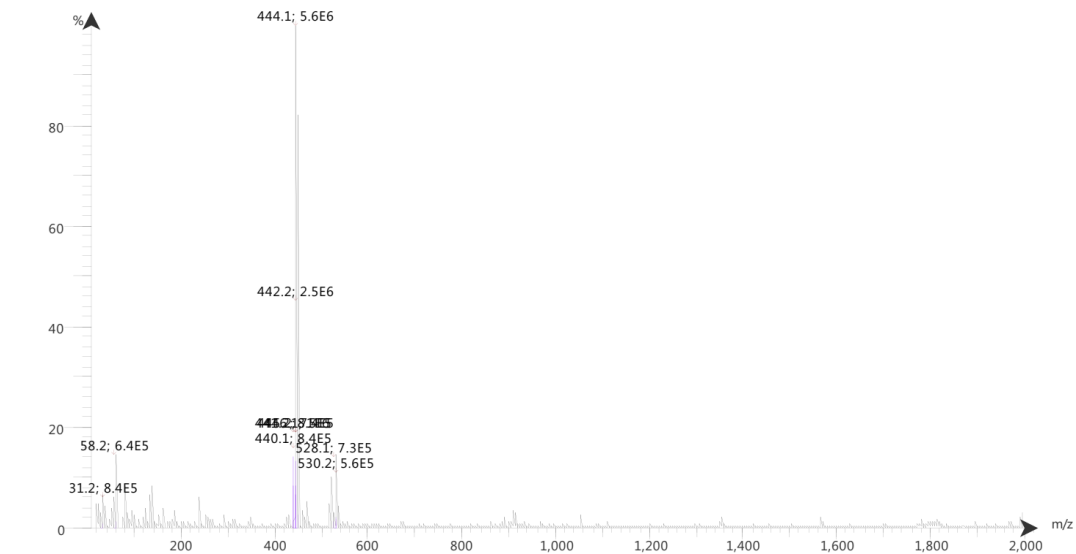

MS chart of compound **10**

**4-((2-(methoxycarbonyl)-4-(methylselanyl)phenyl)amino)-4-oxobut-2-enoic acid (11)**

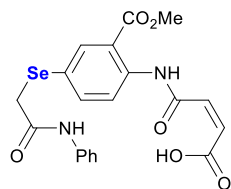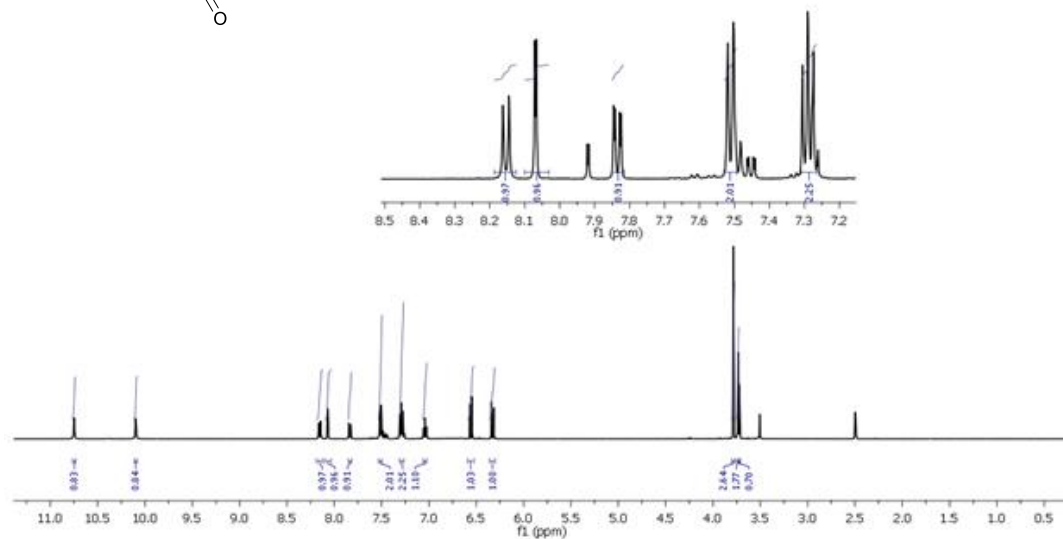

<sup>1</sup>H NMR chart of compound **11**

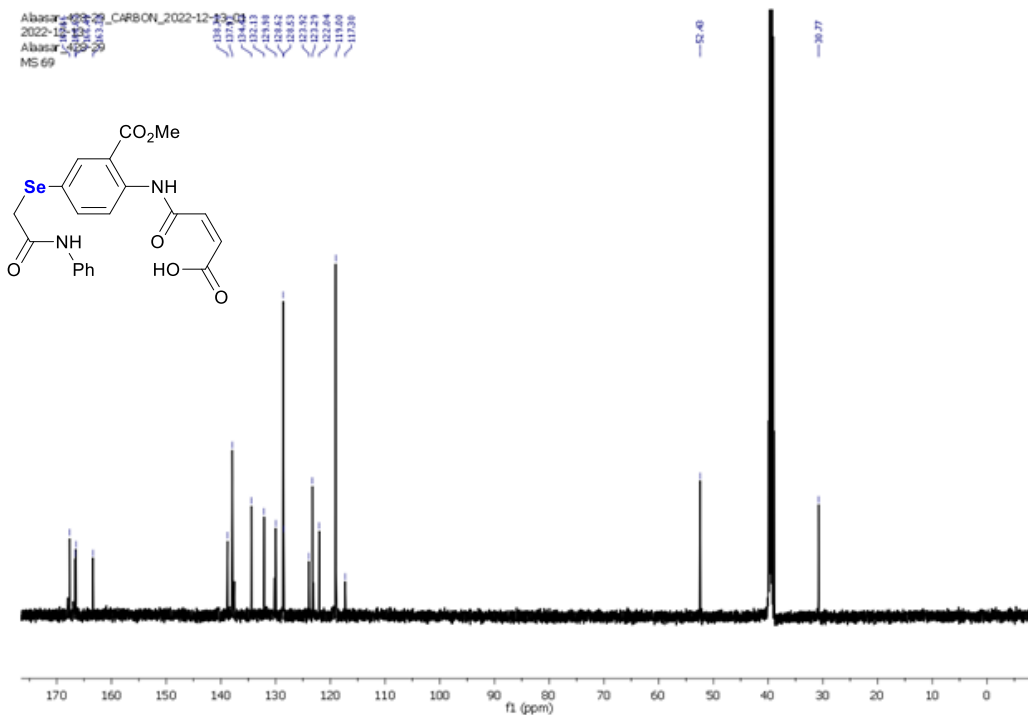

<sup>13</sup>C NMR chart of compound **11**

Agilent Resolutions Pro

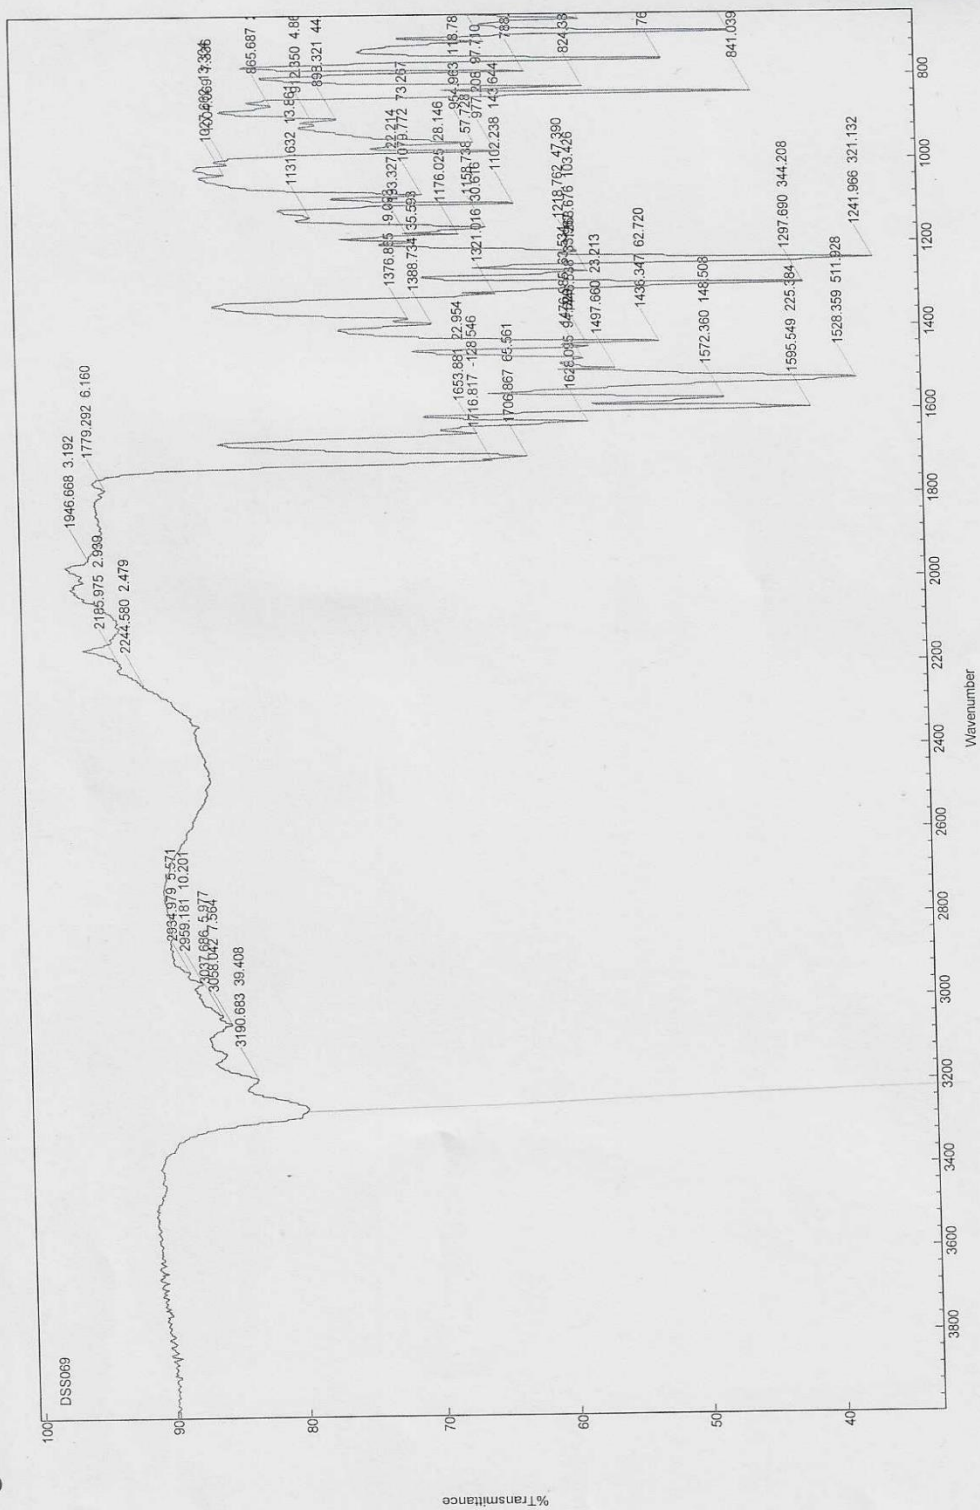

|        |
|--------|
| Name   |
| DSS069 |

IR chart of compound 11

Spectrum RT 0:56 - 1:33 (83 scans) - Background Subtracted 0 - 0:53  
Alaasar\_DS069-2\_Scan2\_is2.datx 2023.03.01 15:02:14 ;  
ESI - Max: 2.6E7

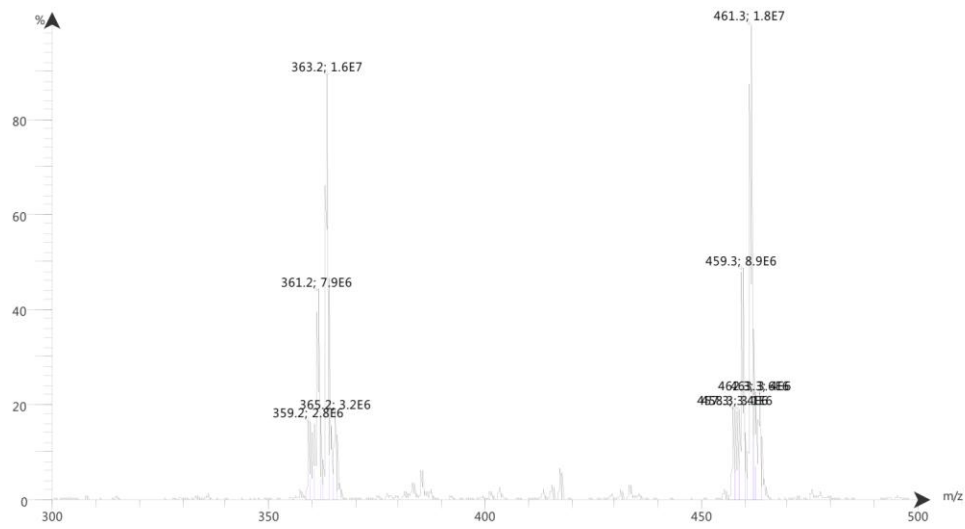

MS chart of compound 11

Spectrum RT 0:47 - 1:34 (13 scans) - Background Subtracted 0 - 0:47  
Alaasar\_DS069-1\_Scan1\_is1.datx 2023.03.01 14:57:00 ;  
ESI + Max: 5E6

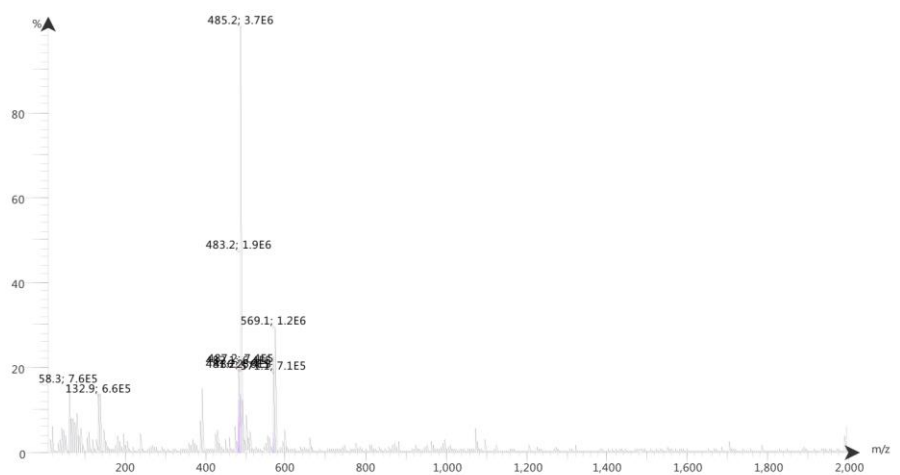

MS chart of compound 11



Spectrum RT 0.58 - 1.33 (79 scans) - Background Subtracted 0 - 0.55  
Alaasar\_DS069-2\_Scan1\_is1.datx 2023.03.01 15:02:13 ;  
ESI + Max: 9E6

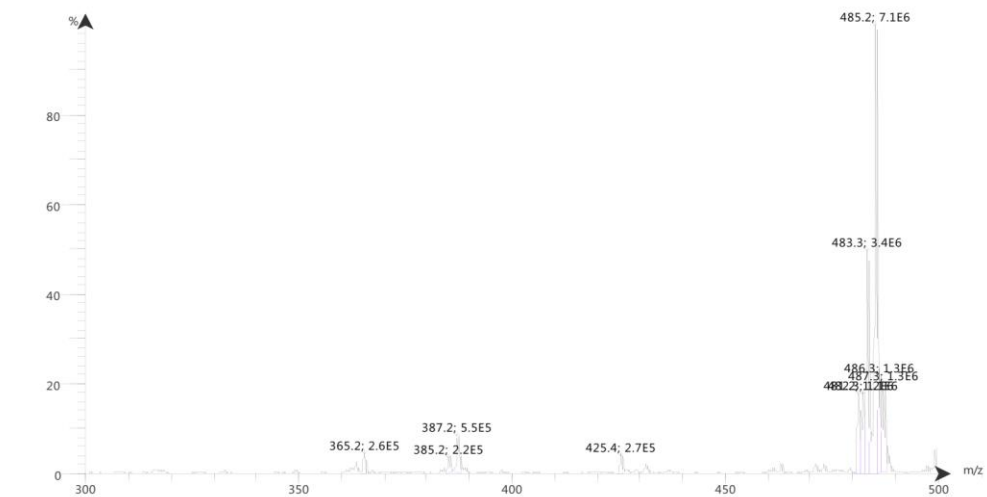

MS chart of compound **11**

**4-((2-(methoxycarbonyl)-4-(methylselenanyl)phenyl)amino)-4-oxobut-2-enoic acid (12)**

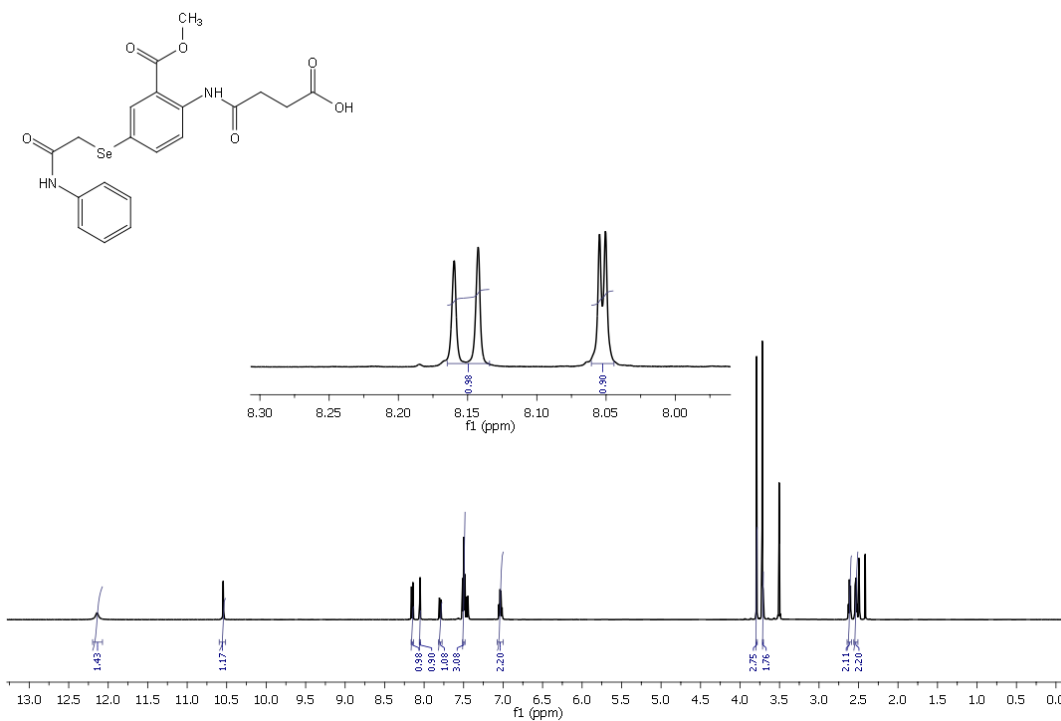

**<sup>1</sup>H NMR chart of compound 12**

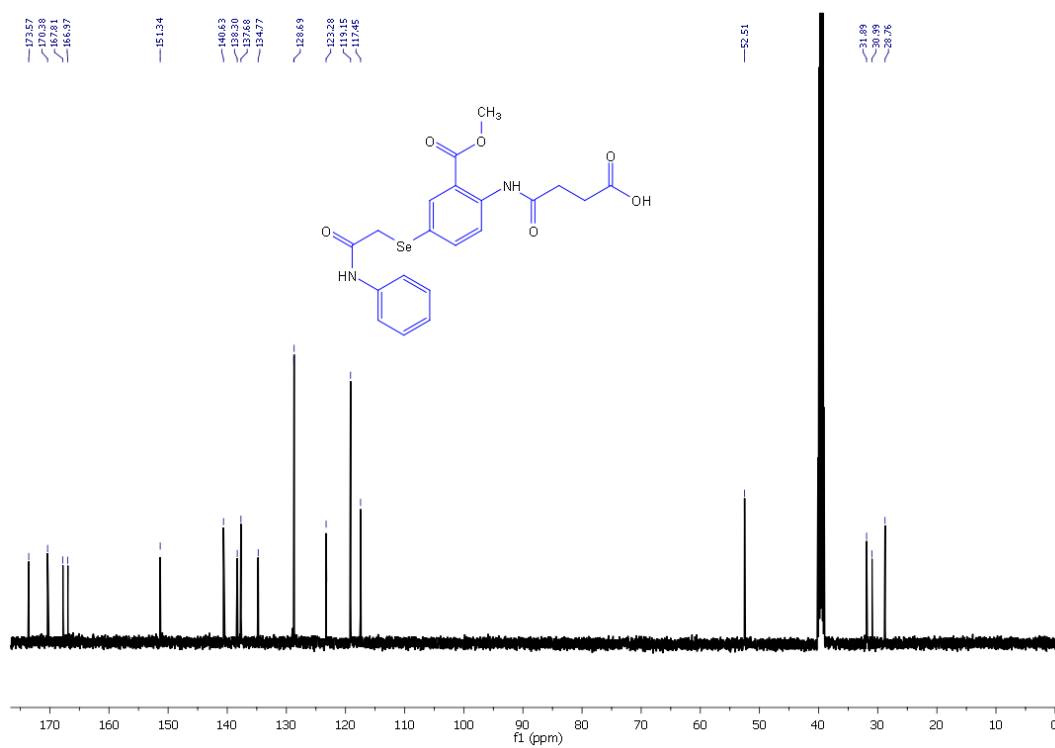

**<sup>13</sup>C NMR chart of compound 12**



Spectrum RT 0:53 - 1:36 (12 scans) - Background Subtracted 0:02 - 0:49  
Alaasar\_DS070-1\_Scan2\_is2.datx 2023.03.01 15:08:49 ;  
ESI - Max: 2.7E7

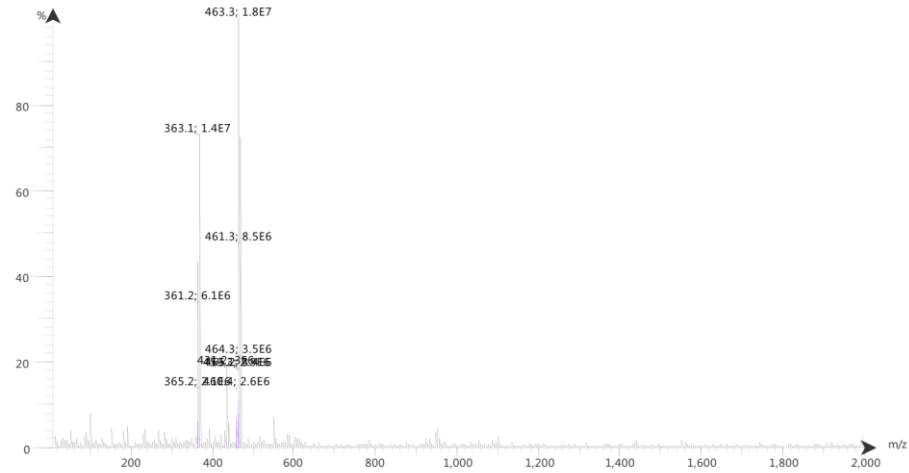

MS chart of compound 12

Spectrum RT 0:50 - 1:23 (73 scans) - Background Subtracted 0 - 0:48  
Alaasar\_DS070-2\_Scan2\_is2.datx 2023.03.01 15:14:37 ;  
ESI - Max: 3.4E7

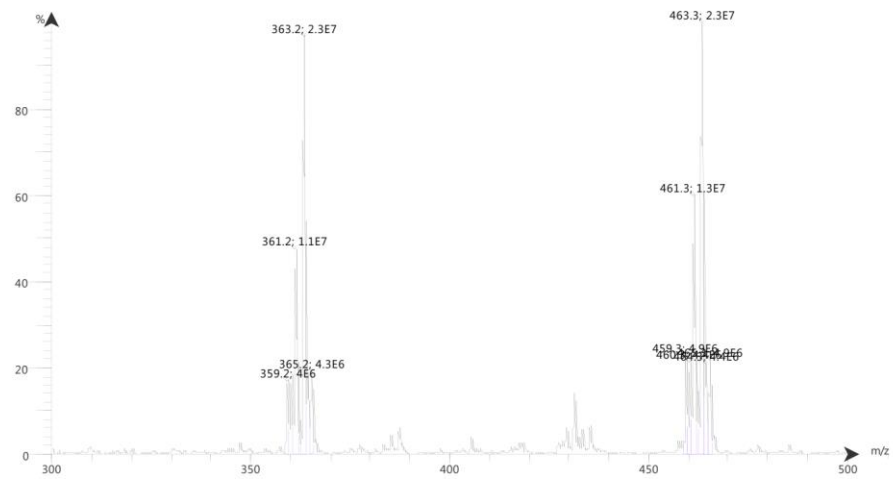

MS chart of compound 12

Spectrum RT 0:55 - 1:42 (13 scans) - Background Subtracted 0 - 0:55  
Alaasar\_DS070-1\_Scan1\_is1.datx 2023.03.01 15:08:47 ;  
ESI + Max: 1.3E7

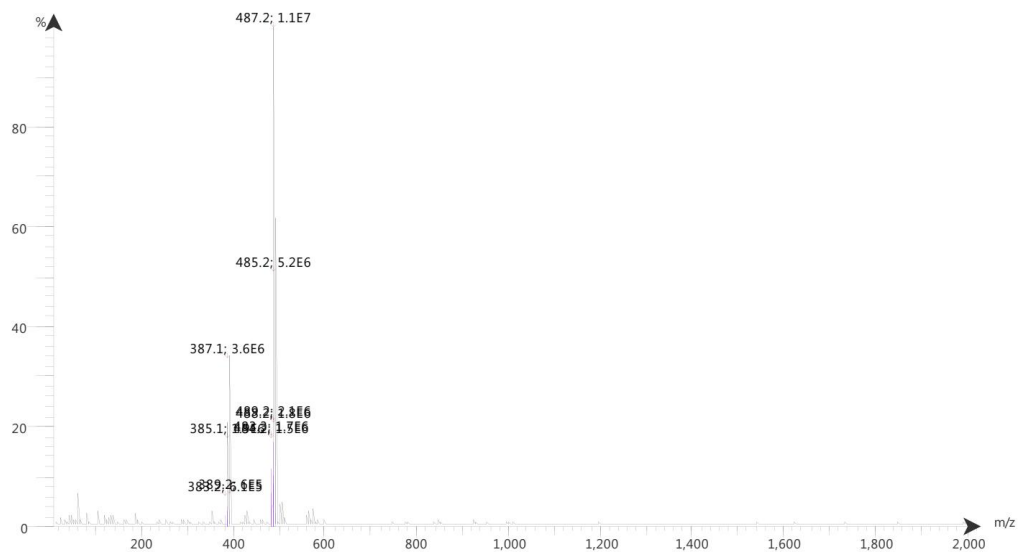

MS chart of compound 12

## SI2. Anti-inflammatory markers assay (Enzyme-linked Immunosorbent Assay)

The microplate provided in this kit has been pre-coated with an antibody specific to COX-2, IL-6, and IL-1 $\beta$ . Standards or samples are then added to the appropriate microplate wells with a biotin-conjugated antibody specific to COX-2, IL-6, and IL-1 $\beta$ . Next, Avidin conjugated to Horseradish Peroxidase (HRP) is added to each microplate well and incubated. After the TMB substrate solution is added, only those wells that contain COX-2, IL-6, and IL-1 $\beta$ , biotin-conjugated antibody, and enzyme-conjugated Avidin will exhibit a color change. The enzyme-substrate reaction is terminated by the addition of sulphuric acid solution and the color change is measured spectrophotometrically at a wavelength of 450 nm  $\pm$  10 nm. The concentration of COX-2, IL-6, and IL-1 $\beta$  in the samples is then determined by comparing the O.D. of the samples to the standard curve. Average the duplicate readings for each standard, control, and sample, and subtract the average zero standard optical density. Construct a standard curve by plotting the mean O.D. and concentration for each standard and draw a best-fit curve through the points on the graph or create a standard curve on log-log graph paper with COX-2, IL-6, and IL-1 $\beta$  concentration on the y-axis and absorbance on the x-axis. Using some plot software, for instance, Curve Expert 1.30, is also recommended. If samples have been diluted, the concentration read from the standard curve must be multiplied by the dilution factor.

### *Procedure*

1. Determine wells for diluted standard, blank, and sample (**3a**, **3b**, **3c**, or **5a**). Prepare 7 wells for standard, 1 well for blank. Add 100  $\mu$ L each of dilutions of standard, blank, and samples into the appropriate wells. Cover with the Plate sealer. Incubate for 1 h at 37  $^{\circ}$ C.
2. Remove the liquid from each well, don't wash.
3. Add 100  $\mu$ L of Detection Reagent A working solution to each well, cover the wells with the plate sealer, and incubate for 1 h at 37  $^{\circ}$ C.
4. Aspirate the solution and wash with 350  $\mu$ L of 1 $\times$  Wash Solution to each well using a squirt bottle, multi-channel pipette, manifold dispenser, or autowasher, and let it sit for 1~2 min. Remove the remaining liquid from all wells completely by snapping the plate onto absorbent paper. Totally wash 3 times. After the last wash, remove any remaining Wash Buffer by aspirating or decanting. Invert the plate and blot it against absorbent paper.

5. Add 100  $\mu\text{L}$  of Detection Reagent B working solution to each well, cover the wells with the plate sealer, and incubate for 30 min at 37  $^{\circ}\text{C}$ .
6. Repeat the aspiration/wash process for a total of 5 times as conducted in step 4.
7. Add 90  $\mu\text{L}$  of Substrate Solution to each well. Cover with a new Plate sealer. Incubate for 10-20 min at 37  $^{\circ}\text{C}$  (Don't exceed 30 min). Protect from light. The liquid will turn blue with the addition of a Substrate Solution.
8. Add 50  $\mu\text{L}$  of Stop Solution to each well. The liquid will turn yellow with the addition of the stop solution. Mix the liquid by tapping the side of the plate. If the color change does not appear uniform, gently tap the plate to ensure thorough mixing.
9. Remove any drop of water and fingerprint on the bottom of the plate and confirm there is no bubble on the surface of the liquid. Then, run the microplate reader and conduct measurement at 450 nm immediately.

### **SI3. Molecular dynamic simulations**

The molecular dynamic simulations were carried out using the Desmond simulation package of Schrödinger LLC.<sup>5-7</sup> The NP $\gamma$ T ensemble with the temperature 300 K and a pressure 1.01 bar was applied in all runs. The simulation length was 200 ns with a relaxation time of 1 ps. The OPLS3 force field parameters were used in all simulations.<sup>8</sup> The cutoff radius in Coulomb interactions was 9.0  $\text{\AA}$ . The orthorhombic periodic box boundaries were set 10  $\text{\AA}$  away from the protein atoms. The water molecules were explicitly described using the transferable intermolecular potential with the three points (TIP3P) model.<sup>9</sup> Salt concentration was set to 0.15 M NaCl and was built using the System Builder utility of Desmond. The Martyna–Tuckerman–Klein chain coupling scheme with a coupling constant of 2.0 ps was used for the pressure control and the Nosé–Hoover chain coupling scheme for the temperature control.<sup>10-</sup><sup>11</sup> Nonbonded forces were calculated using a RESPA integrator where the short-range forces were updated every step, and the long-range forces were updated every three steps. The trajectories were saved at 300 ps intervals for analysis. The behavior and interactions between the ligands and protein were analyzed using the Simulation Interaction Diagram tool implemented in the Desmond MD package. The stability of MD simulations was monitored by looking at the RMSD of the ligand and protein atom positions as a function of simulation time.

#### SI4. MD trajectory analysis and prime MM-GBSA calculations

Simulation interactions diagram panel of Maestro software was used to monitoring interactions contribution in the ligand-protein stability. The molecular mechanics generalized born/solvent accessibility (MM – GBSA) was performed to calculate the ligand binding free energies and ligand strain energies for docked compounds over the last 50 ns with thermal\_mmgsa.py python script provided by Schrodinger which takes a Desmond trajectory file, splits it into individual snapshots, runs the MM-GBSA calculations on each frame, and outputs the average computed binding energy.

#### References

1. Al-Abdallah, B.; Al-Faiyz, Y. S.; Shaaban, S., Anticancer, Antimicrobial, and Antioxidant Activities of Organodiselenide-Tethered Methyl Anthranilates. *Biomolecules* **2022**, *12* (12), 1765.
2. Sak, M.; Al-Faiyz, Y. S.; Elsayy, H.; Shaaban, S., Novel organoselenium redox modulators with potential anticancer, antimicrobial, and antioxidant activities. *Antioxidants* **2022**, *11* (7), 1231.
3. Shaaban, S.; Al-Faiyz, Y. S.; Alsulaim, G. M.; Alaasar, M.; Amri, N.; Ba-Ghazal, H.; Al-Karmalawy, A. A.; Abdou, A., Synthesis of new organoselenium-based succinilic and maleanilic derivatives and in silico studies as possible SARS-CoV-2 main protease inhibitors. *Inorganics* **2023**, *11* (8), 321.
4. Al-Abdallah, B.; Al-Faiyz, Y. S.; Shaaban, S., Organoselenocyanates Tethered Methyl Anthranilate Hybrids with Promising Anticancer, Antimicrobial, and Antioxidant Activities. *Inorganics* **2022**, *10* (12), 246.
5. Bowers, K. J.; Chow, D. E.; Xu, H.; Dror, R. O.; Eastwood, M. P.; Gregersen, B. A.; Klepeis, J. L.; Kolossvary, I.; Moraes, M. A.; Sacerdoti, F. D.; Salmon, J. K.; Shan, Y.; Shaw, D. E. In *Scalable Algorithms for Molecular Dynamics Simulations on Commodity Clusters*, SC '06: Proceedings of the 2006 ACM/IEEE Conference on Supercomputing, 11-17 Nov. 2006; 2006; pp 43-43.
6. El-Shershaby, M. H.; Ghiaty, A.; Bayoumi, A. H.; Al-Karmalawy, A. A.; Hussein, E. M.; El-Zoghbi, M. S.; Abulkhair, H. S., From triazolophthalazines to triazoloquinazolines: A bioisosterism-guided approach toward the identification of novel PCAF inhibitors with potential anticancer activity. *Bioorganic & Medicinal Chemistry* **2021**, *42*, 116266.
7. Research, D. E. S. *Desmond Molecular Dynamics System*, New York, NY, 2021.
8. Harder, E.; Damm, W.; Maple, J.; Wu, C.; Reboul, M.; Xiang, J. Y.; Wang, L.; Lupyan, D.; Dahlgren, M. K.; Knight, J. L.; Kaus, J. W.; Cerutti, D. S.; Krilov, G.; Jorgensen, W. L.; Abel, R.; Friesner, R. A., OPLS3: A Force Field Providing Broad Coverage of Drug-like Small Molecules and Proteins. *Journal of Chemical Theory and Computation* **2016**, *12* (1), 281-296.
9. Jorgensen, W. L.; Chandrasekhar, J.; Madura, J. D.; Impey, R. W.; Klein, M. L., Comparison of simple potential functions for simulating liquid water. *Journal of Chemical Physics* **1983**, *79* (2), 926-935.
10. Martyna, G. J.; Klein, M. L.; Tuckerman, M., Nosé–Hoover chains: The canonical ensemble via continuous dynamics. *Journal of Chemical Physics* **1992**, *97* (4), 2635-2643.
11. Martyna, G. J.; Tobias, D. J.; Klein, M. L., Constant pressure molecular dynamics algorithms. *Journal of Chemical Physics* **1994**, *101* (5), 4177-4189.
